# Supplementary material for: Korea hypertension fact sheet 2022: analysis of nationwide population-based data with a special focus on hypertension in the elderly
Source: Springer Nature journal article supplement (doi:10.1186/s40885-023-00243-8), 2023-01-01
Supplement: MOESM1 [file 25925592]

# KOREA HYPERTENSION FACT SHEET 2022

The Korean Society of Hypertension

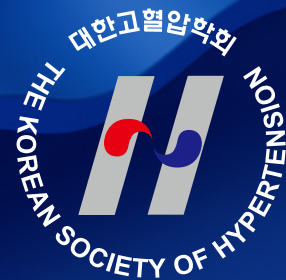

# Methods

## Korea National Health and Nutrition Examination Survey

|                            |                                                                                                                                                    |                                                                                                                |
|----------------------------|----------------------------------------------------------------------------------------------------------------------------------------------------|----------------------------------------------------------------------------------------------------------------|
| Subjects                   | Adults aged 20 years or older / 1998 to 2020                                                                                                       |                                                                                                                |
| Definition of Hypertension | ① Systolic blood pressure (SBP) $\geq$ 140 mmHg, or<br>② Diastolic blood pressure (DBP) $\geq$ 90 mmHg, or<br>③ Taking antihypertensive medication |                                                                                                                |
| Hypertension Management    | Awareness rate                                                                                                                                     | Proportion of people with physician diagnosis of hypertension among those with hypertension                    |
|                            | Treatment rate                                                                                                                                     | Proportion of people taking antihypertensive medication for $\geq$ 20 days/month among those with hypertension |
|                            | Control rate (among prevalent)                                                                                                                     | Proportion of people with SBP $<$ 140 mmHg and DBP $<$ 90 mmHg among those with hypertension                   |
|                            | Control rate (among treated)                                                                                                                       | Proportion of people with SBP $<$ 140 mmHg and DBP $<$ 90 mmHg among those taking antihypertensive medication  |

## Korea National Health Insurance Big Data

|                            |                                              |                                                                                                                                                                                                                                                                                               |
|----------------------------|----------------------------------------------|-----------------------------------------------------------------------------------------------------------------------------------------------------------------------------------------------------------------------------------------------------------------------------------------------|
| Subjects                   | Adults aged 20 years or older / 2002 to 2020 |                                                                                                                                                                                                                                                                                               |
| Healthcare Utilization     | Diagnosis                                    | $\geq$ 1 health insurance claim for hypertension diagnosis (ICD-10: I10) each year                                                                                                                                                                                                            |
|                            | Treatment                                    | $\geq$ 1 health insurance claim for hypertension diagnosis and antihypertensive prescription each year                                                                                                                                                                                        |
|                            | Adherence                                    | Antihypertensive prescription $\geq$ 290 days (80%) each year                                                                                                                                                                                                                                 |
| Antihypertensive Treatment | Regimen                                      | The combination of antihypertensive classes in a prescription; if the regimen is switched, one with the longest duration is selected for a given year                                                                                                                                         |
|                            | Antihypertensive class                       | Diuretics (DU; thiazide and related diuretics, loop diuretics), Beta-blockers (BB), Calcium channel blockers (CCB), Angiotensin converting enzyme inhibitors (ACEi), Angiotensin receptor blockers (ARB), Potassium-sparing diuretics (PSD), Others (ETC; alpha-blockers, vasodilators, etc.) |

# Contents

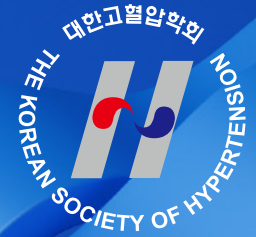

## Trends of Average Blood Pressure and Hypertension Prevalence

- 8 Trends of Average Blood Pressure
- 9 Trends of Average Blood Pressure by Age
- 10 Trends of Hypertension Prevalence
- 12 Trends of Hypertension Prevalence by Sex and Age
- 13 Trends of Number of People with Hypertension

## Trends of Hypertension Management

- 16 Trends of Awareness Rate by Sex and Age
- 17 Trends of Treatment Rate by Sex and Age
- 18 Trends of Control Rate by Sex and Age

## Healthcare Utilization for Hypertension

- 22 Trends of Healthcare Utilization for Hypertension
- 23 Trends of Co-Treatment for Dyslipidemia and Diabetes
- 24 Trends of Antihypertensive Medication Use
- 26 Composition of Antihypertensive Treatment
- 28 Antihypertensive Medication Use by Sex and Age

## Hypertension in the Elderly

- 31 Trends of Number of People with Hypertension by Management Status
- 32 Trends of Awareness Rate in the Elderly
- 33 Trends of Treatment Rate in the Elderly
- 34 Trends of Adherence Rate in the Elderly
- 35 Trends of Combination Therapy Rate in the Elderly
- 36 Trends of Average Blood Pressure in the Elderly

# Summary of Hypertension Statistics (Age 20+)

**12.6 million**  
have hypertension

**10.5 million**  
are diagnosed

**9.9 million**  
are treated

**7.4 million**  
are adherent  
to treatment

Data Source: Korea National Health and Nutrition Examination Survey 2020, Korea National Health Insurance Big Data 2020

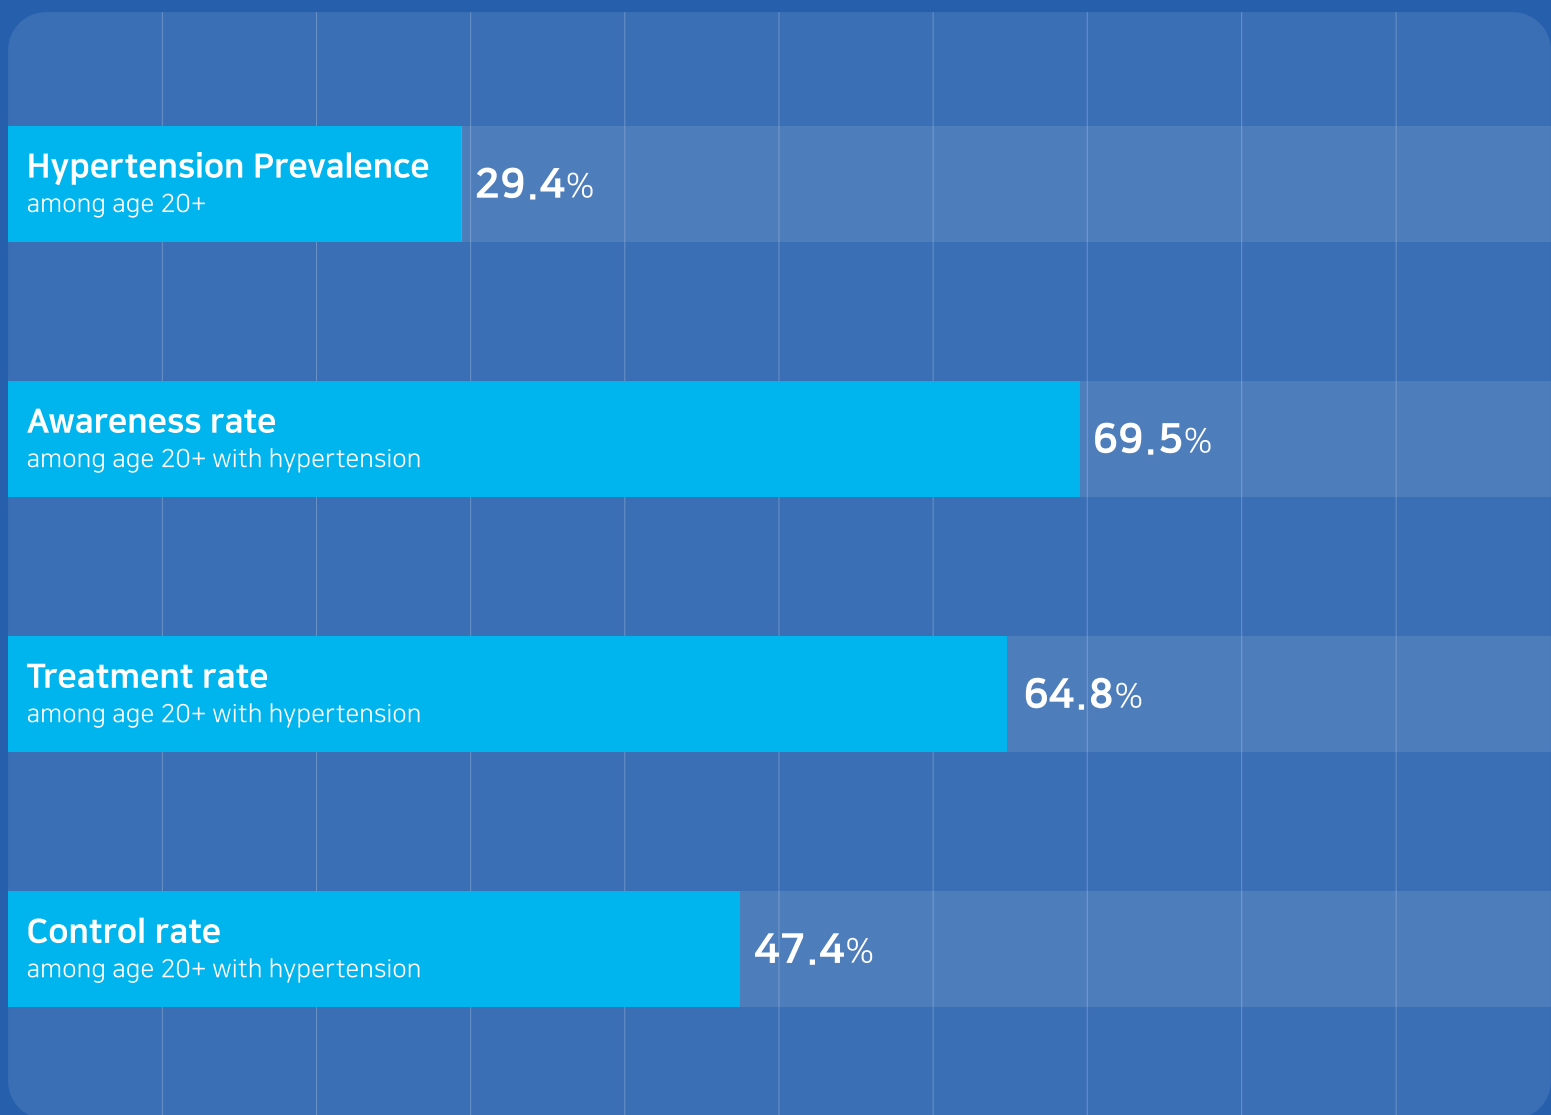

Data Source: Korea National Health and Nutrition Examination Survey 2020

# KOREA HYPERTENSION FACT SHEET 2022

# Trends of Average Blood Pressure and Hypertension Prevalence

Trends of Average Blood Pressure

Trends of Average Blood Pressure by Age

Trends of Hypertension Prevalence

Trends of Hypertension Prevalence by Sex and Age

Trends of Number of People with Hypertension

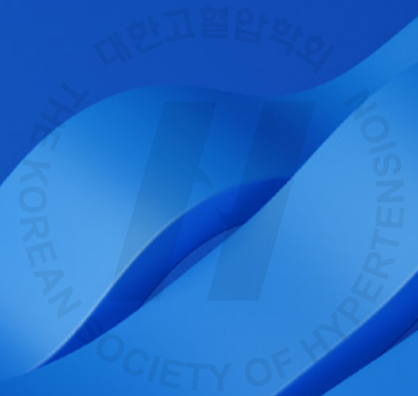

# Trends of Average Blood Pressure

(Age 20+, Age-standardized)

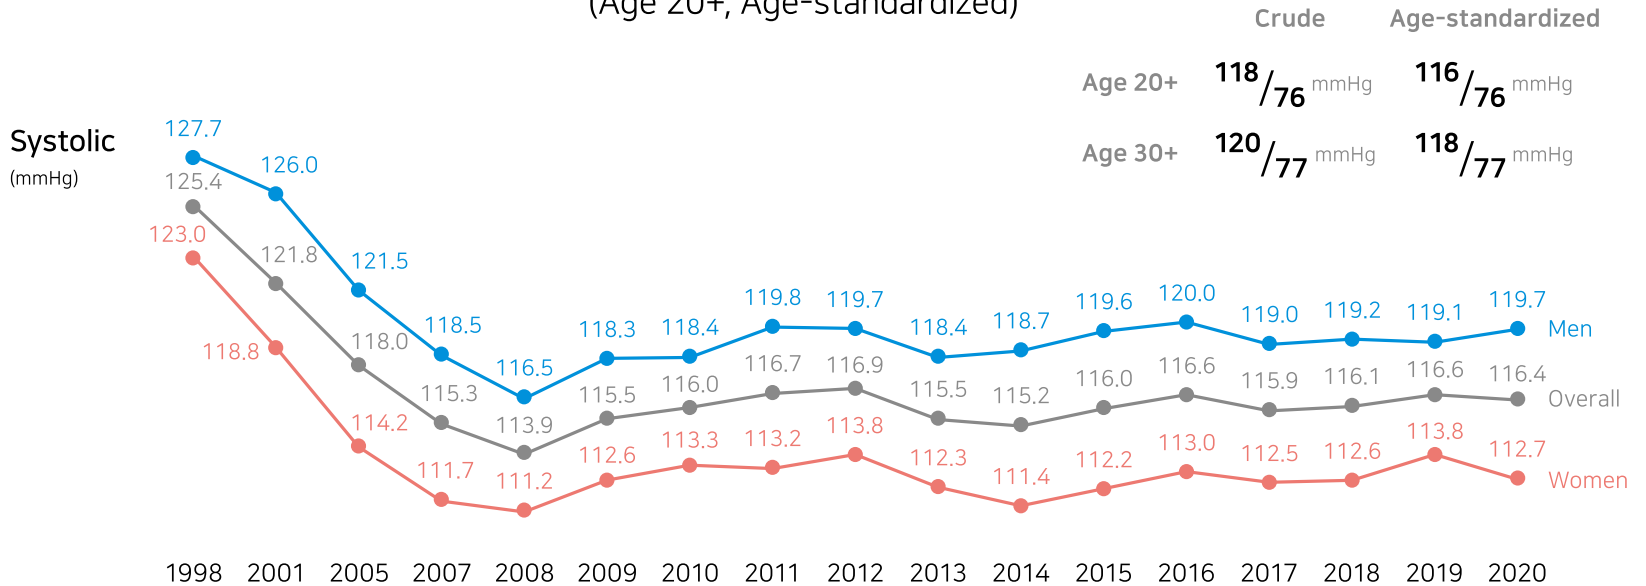

## Diastolic (mmHg)

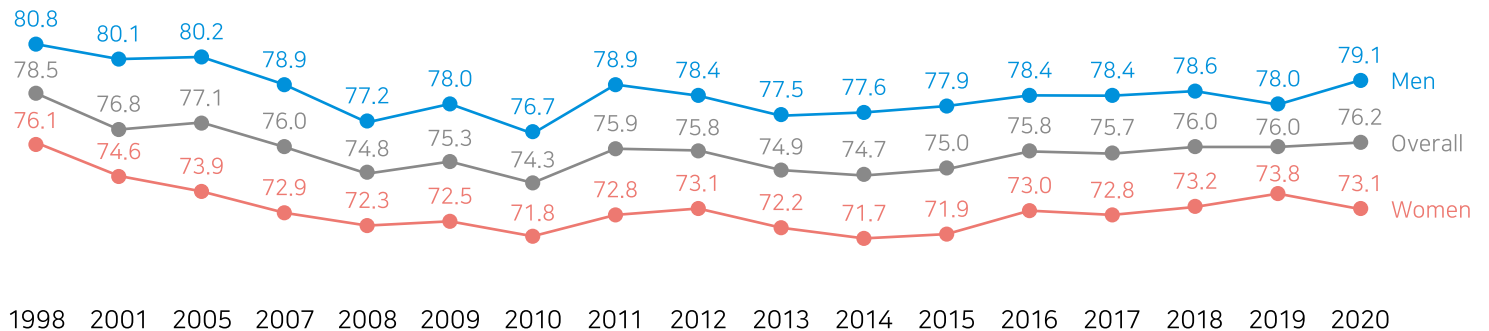

Data Source: Korea National Health and Nutrition Examination Survey 1998-2020  
(Directly age-standardized to the 2005 projected population)



# Trends of Average Blood Pressure by Age

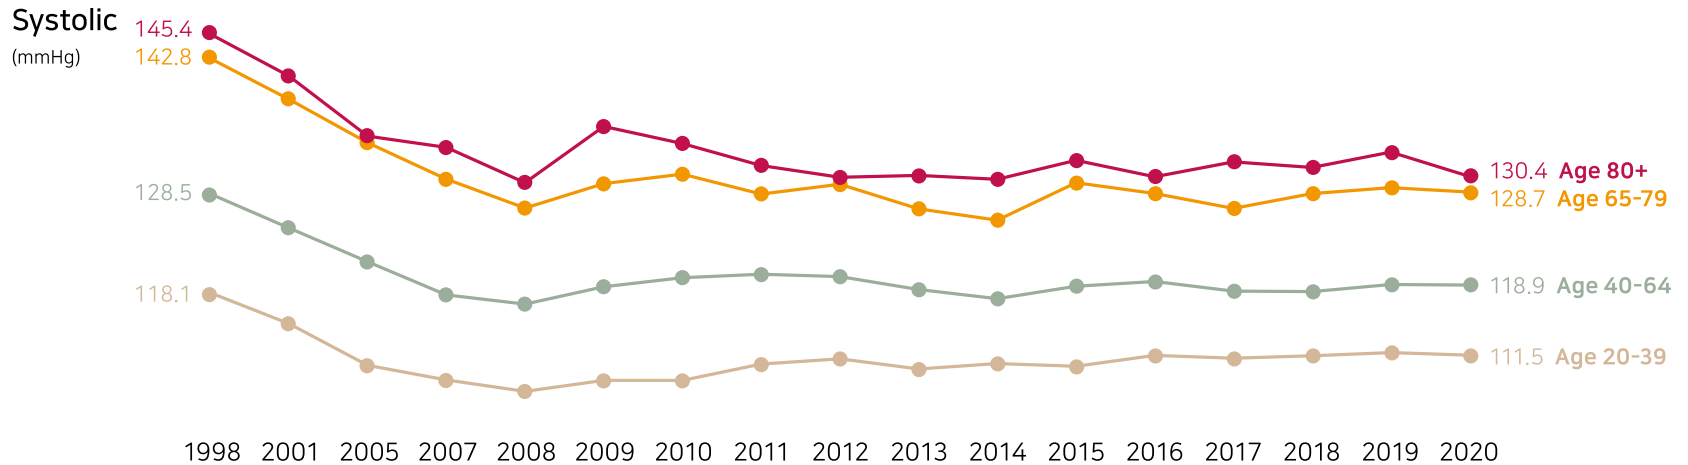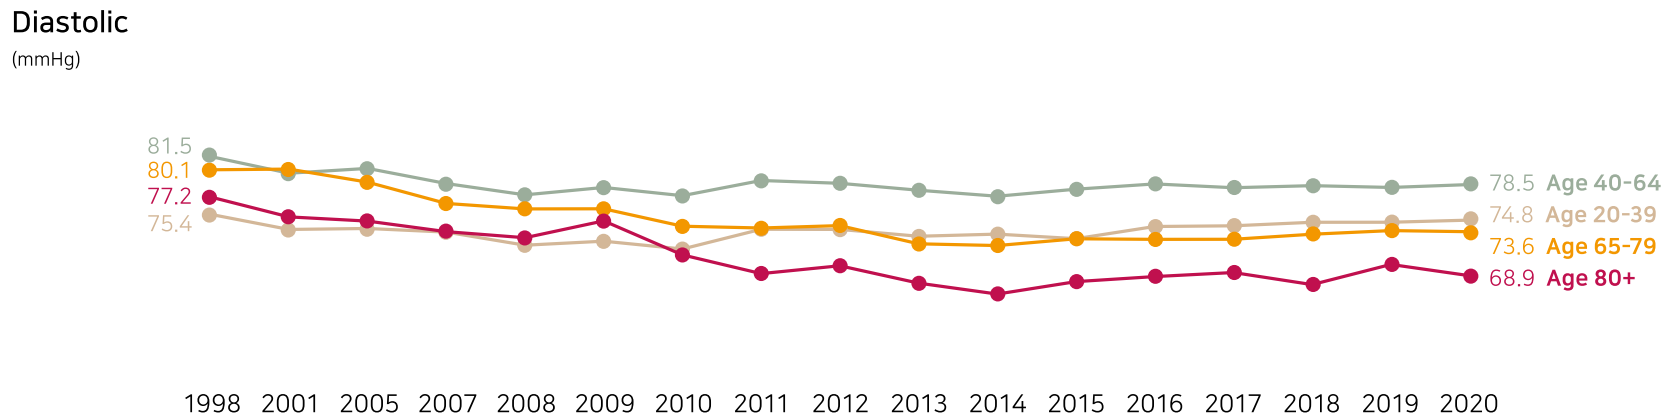

Data Source: Korea National Health and Nutrition Examination Survey 1998-2020

# Trends of Hypertension Prevalence

(Age 20+, Age-standardized)

Crude Age 20+ **29 %**  
 Age-standardized **23 %**

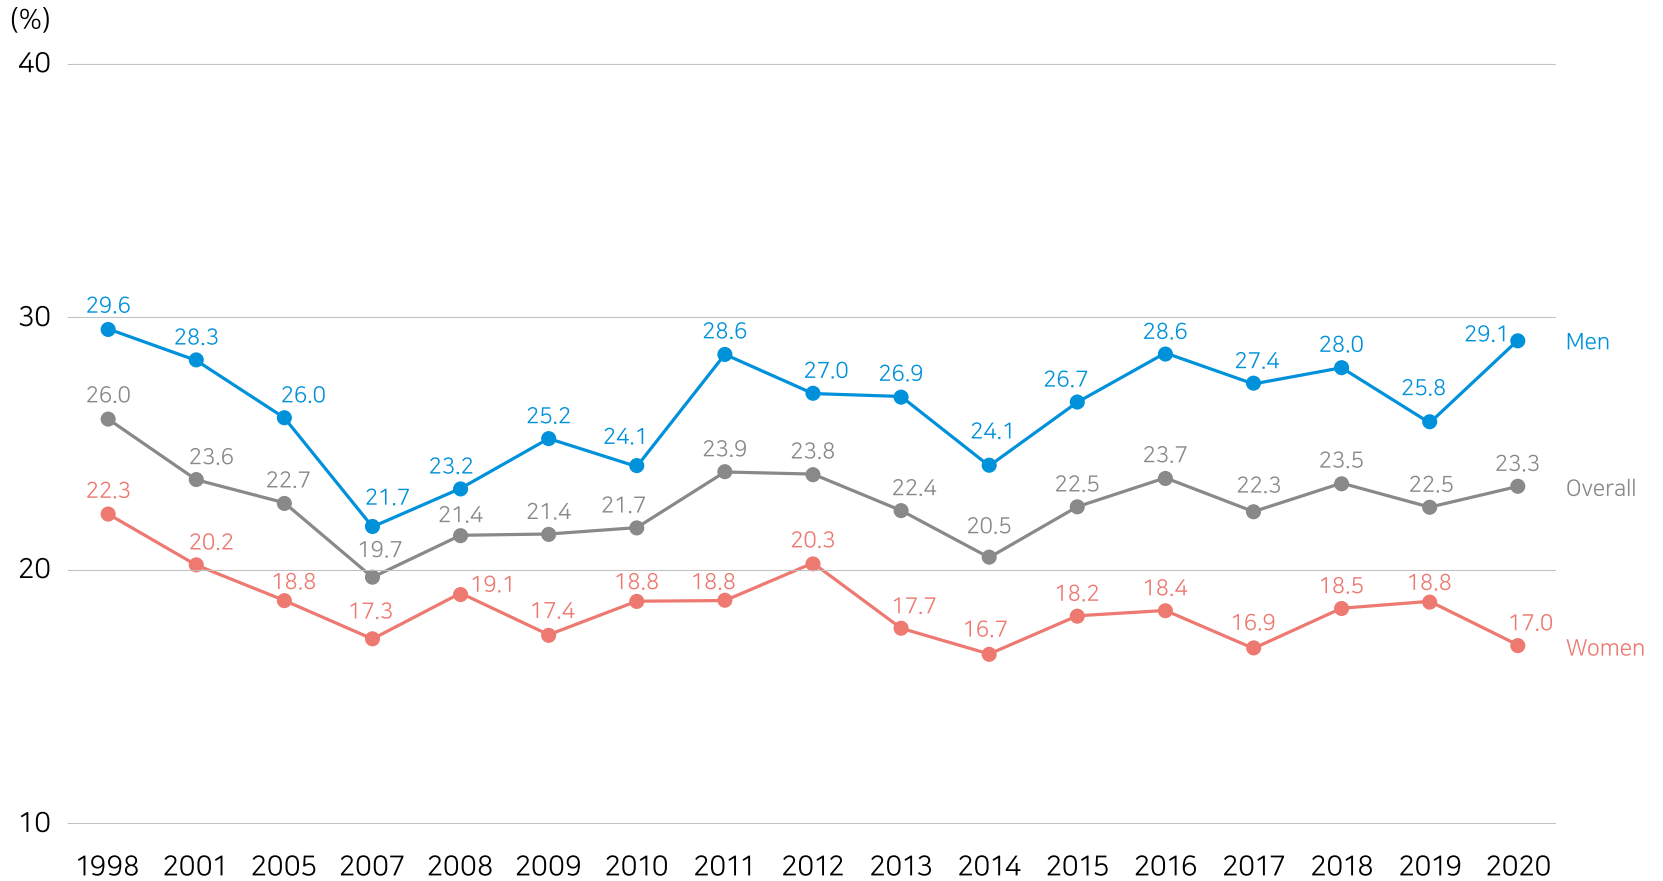

Data Source: Korea National Health and Nutrition Examination Survey 1998-2020  
 (Directly age-standardized to the 2005 projected population)

# Trends of Hypertension Prevalence

(Age 30+, Age-standardized)

Crude Age 30+ **34%** Age-standardized **28%**

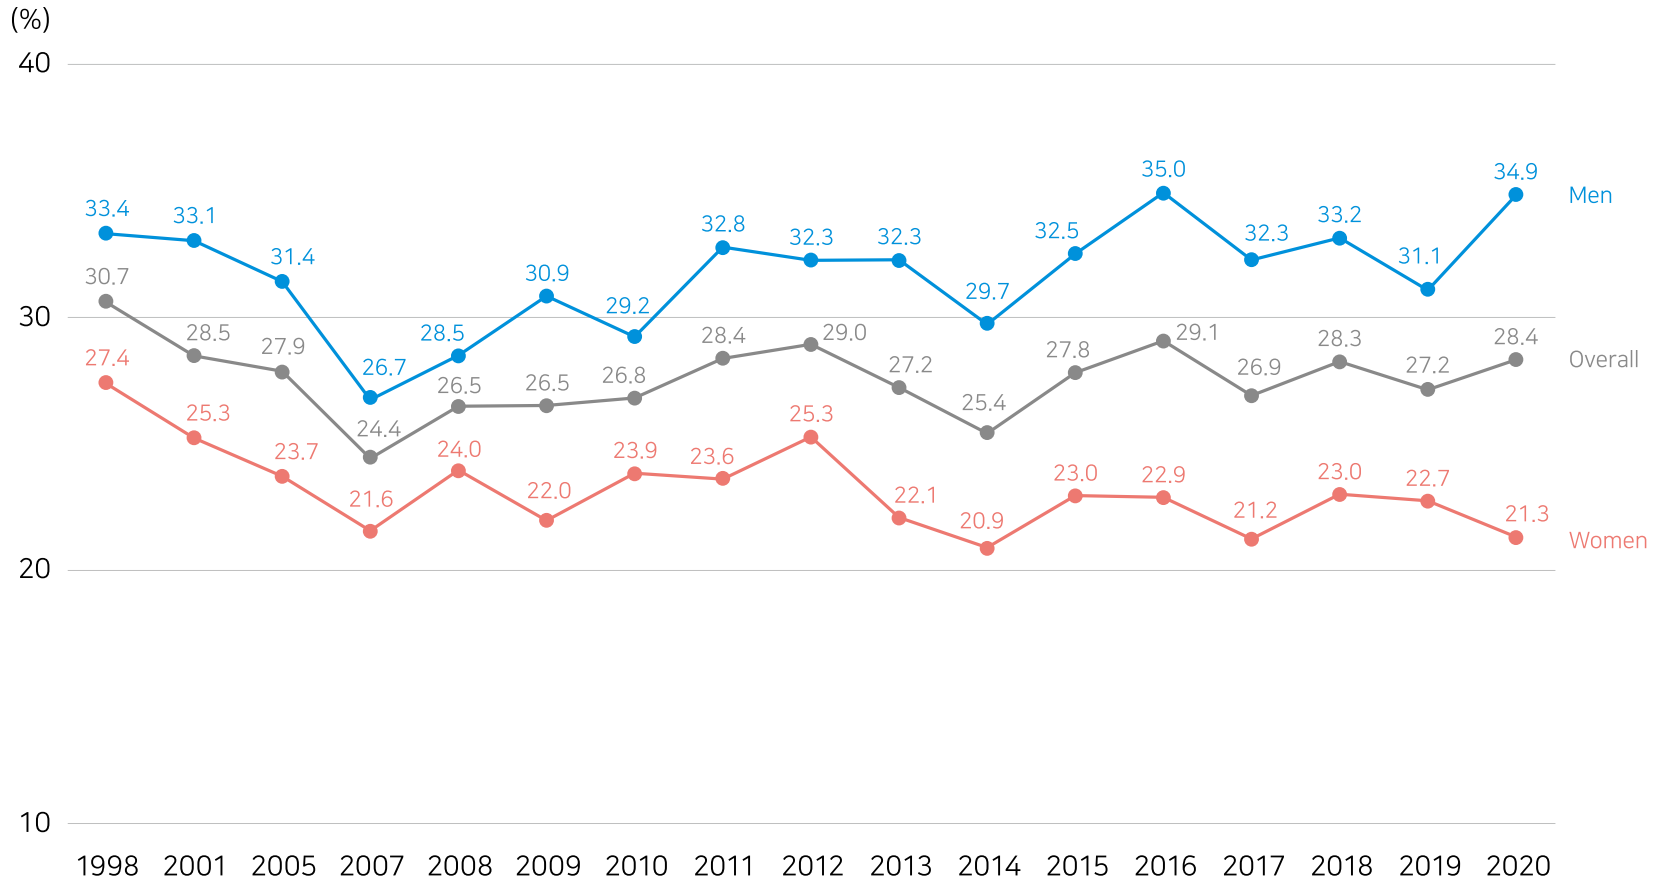

Data Source: Korea National Health and Nutrition Examination Survey 1998-2020  
(Directly age-standardized to the 2005 projected population)

# Trends of Hypertension Prevalence by Sex and Age

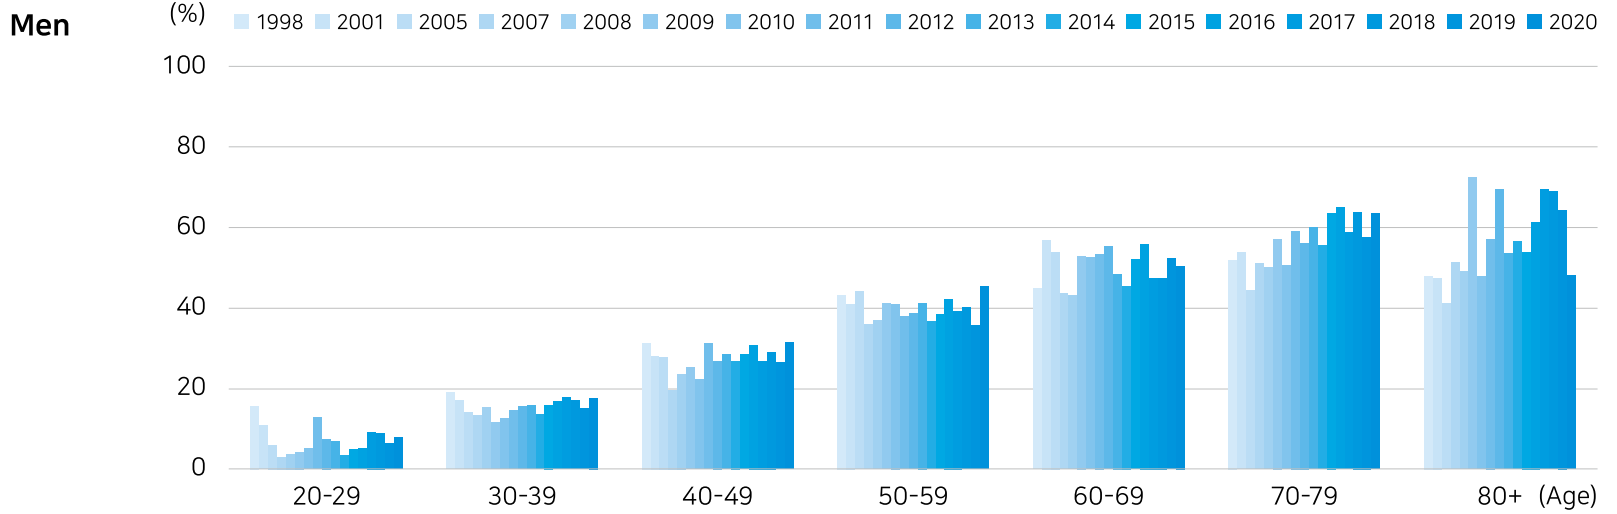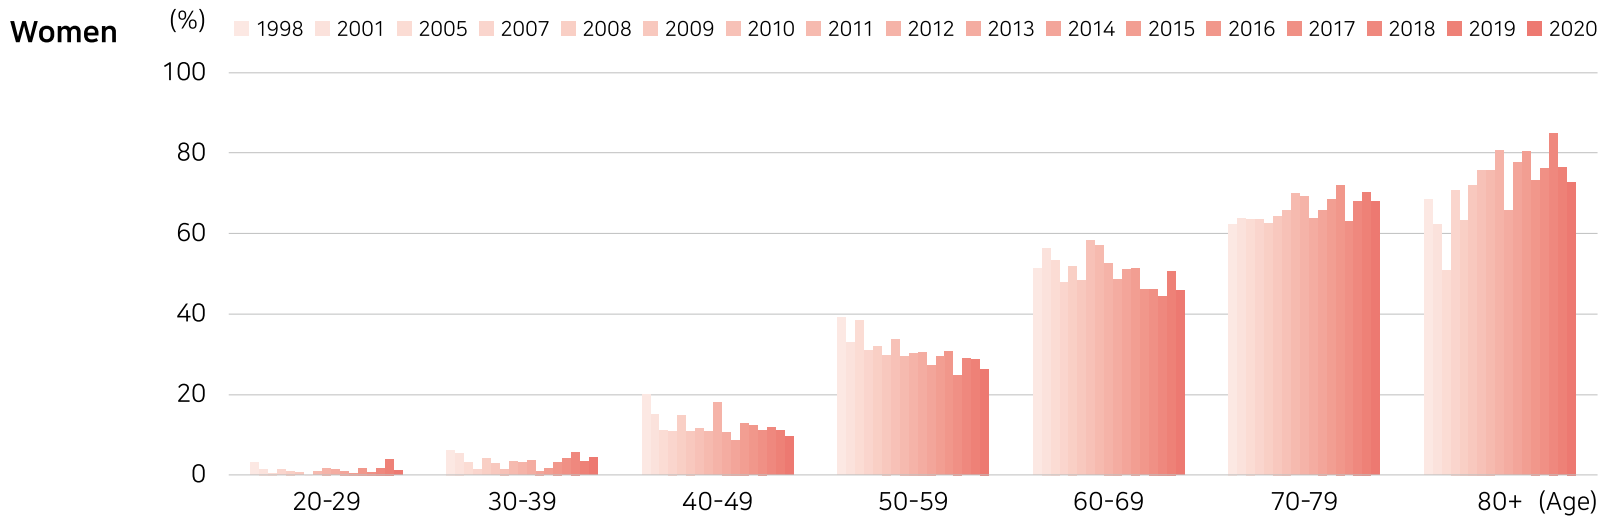

Data Source: Korea National Health and Nutrition Examination Survey 1998-2020

# Trends of Number of People with Hypertension

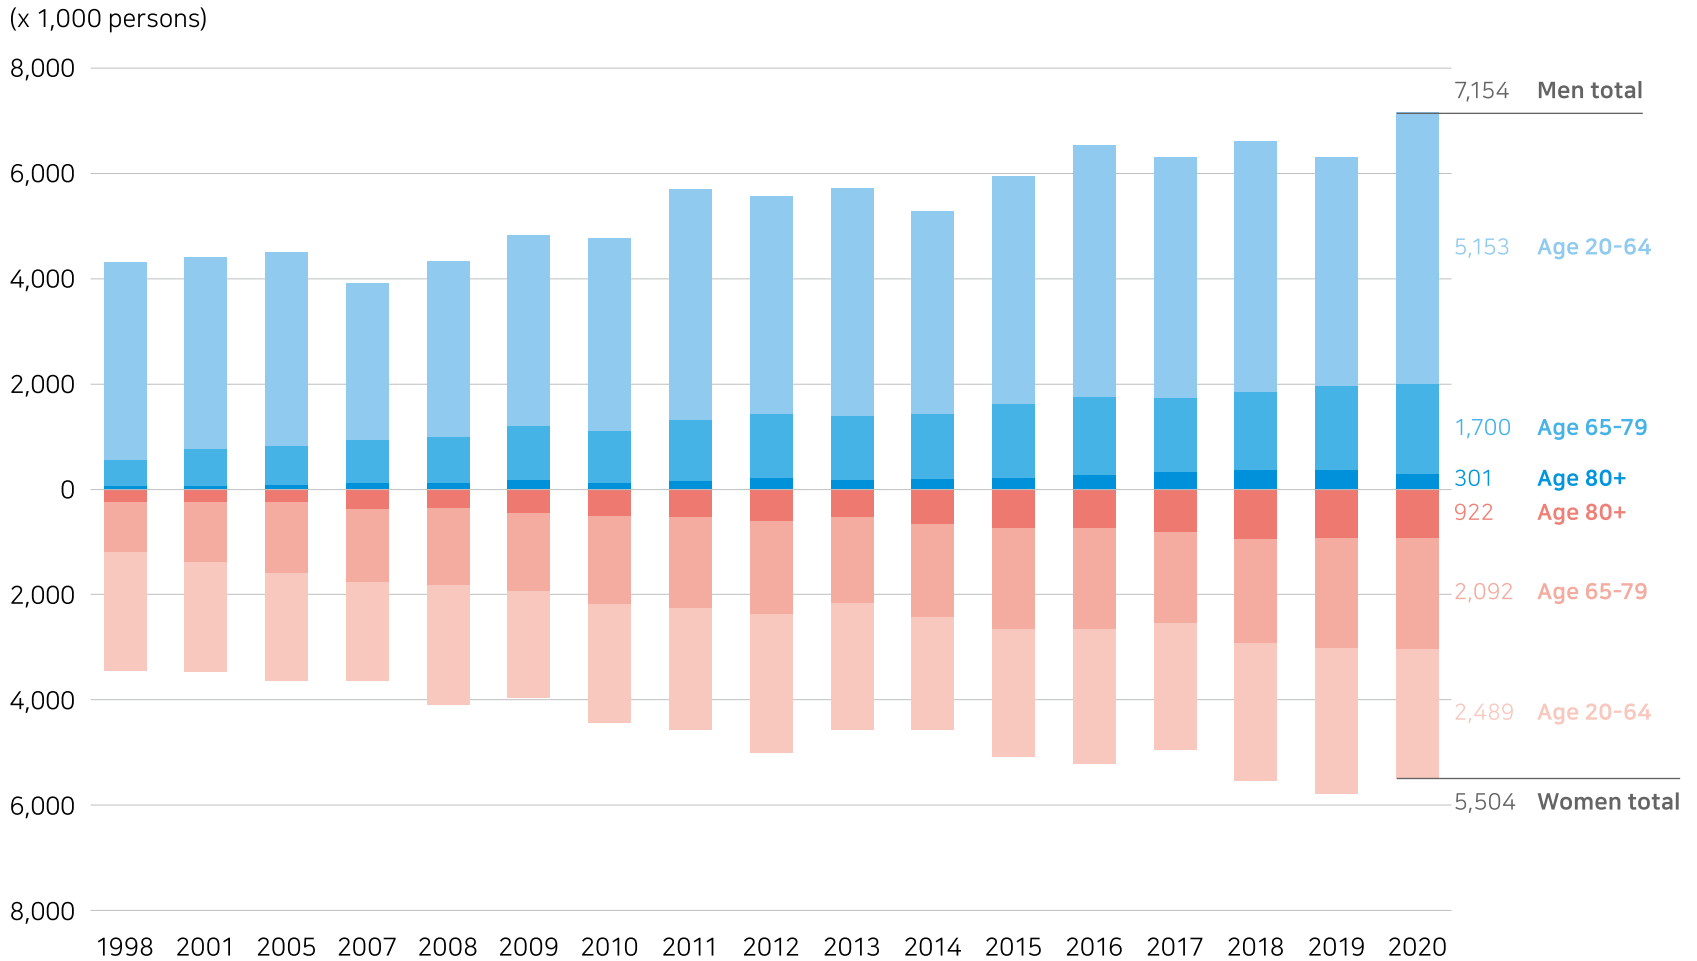

Data Source: Korea National Health and Nutrition Examination Survey 1998-2020

# KOREA HYPERTENSION FACT SHEET 2022

# Trends of Hypertension Management

Trends of Awareness Rate by Sex and Age

Trends of Treatment Rate by Sex and Age

Trends of Control Rate by Sex and Age

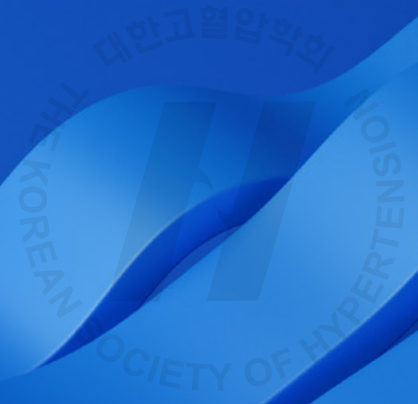

# Trends of Awareness Rate by Sex and Age

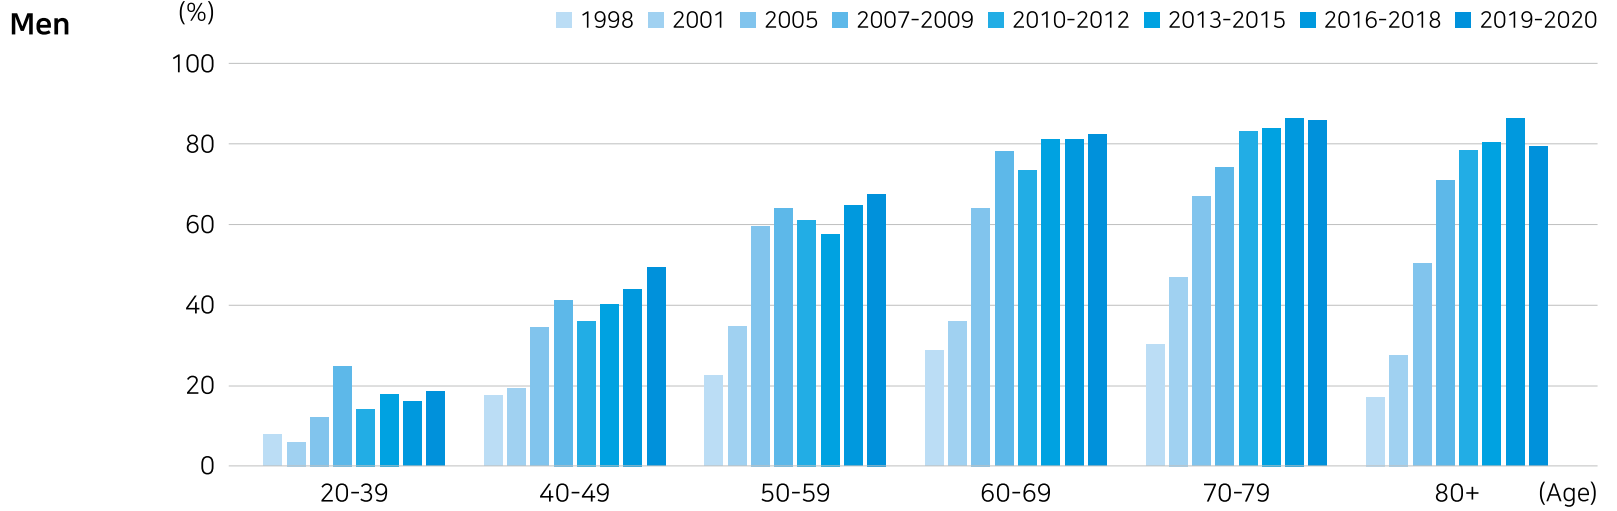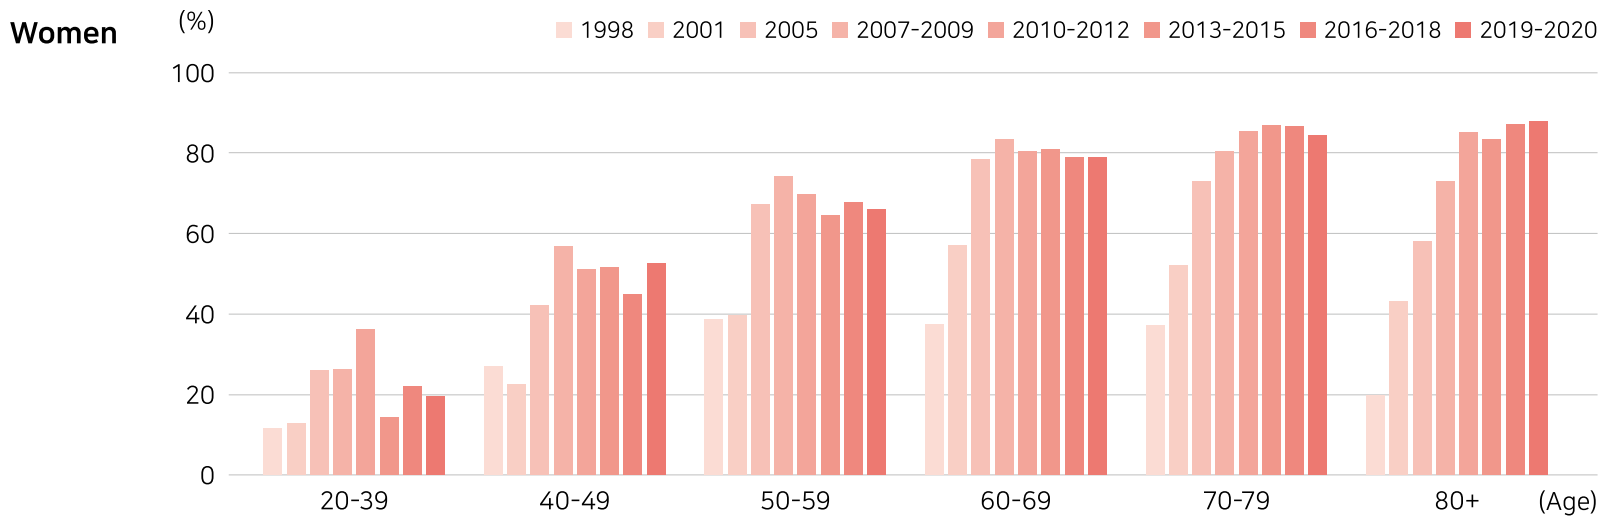

Data Source: Korea National Health and Nutrition Examination Survey 1998-2020



# Trends of Treatment Rate by Sex and Age

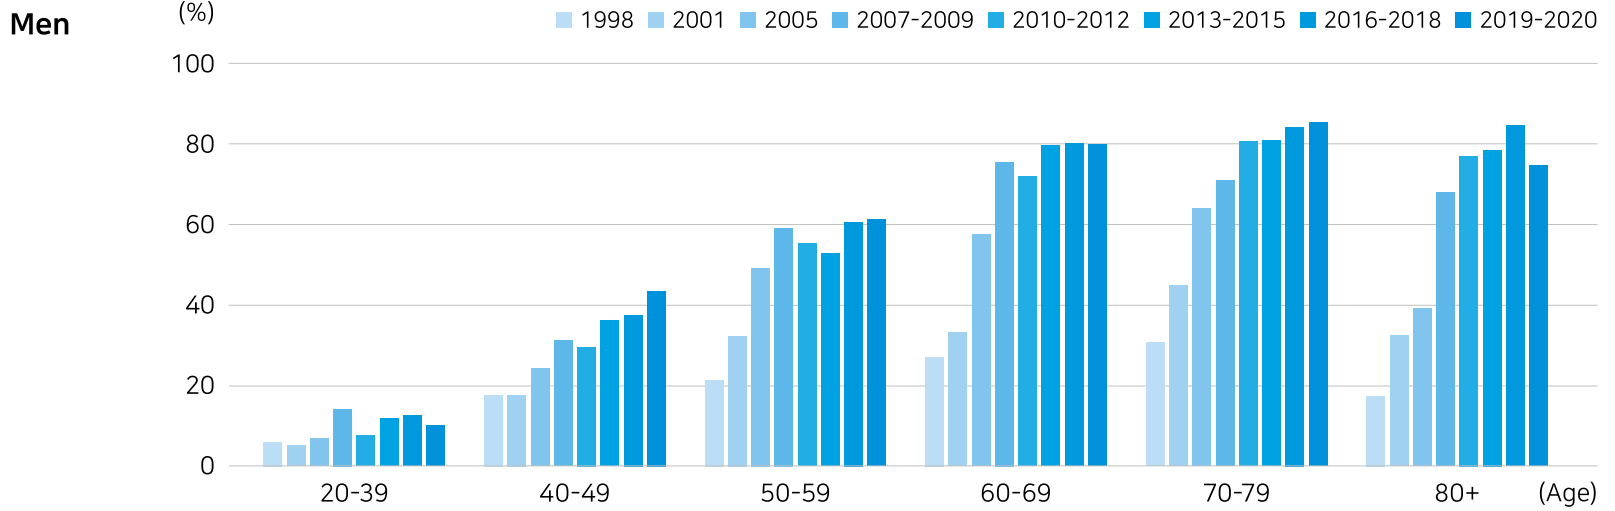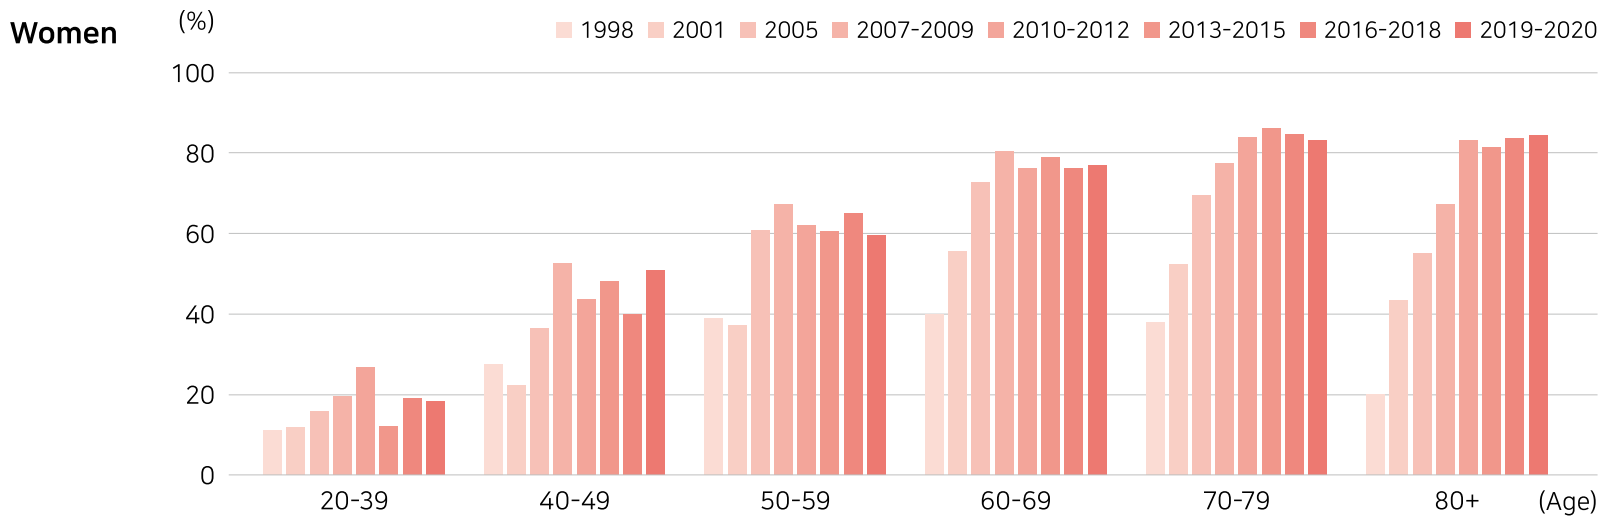

Data Source: Korea National Health and Nutrition Examination Survey 1998-2020

# Trends of Control Rate by Sex and Age

(Among prevalent)

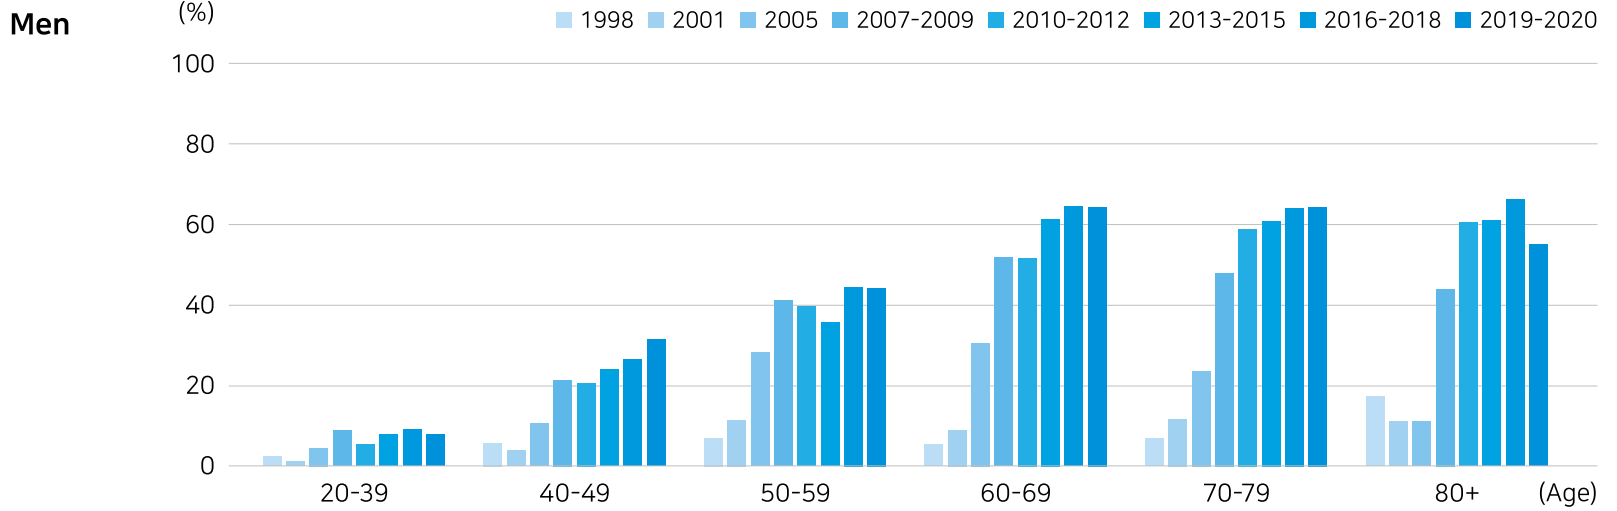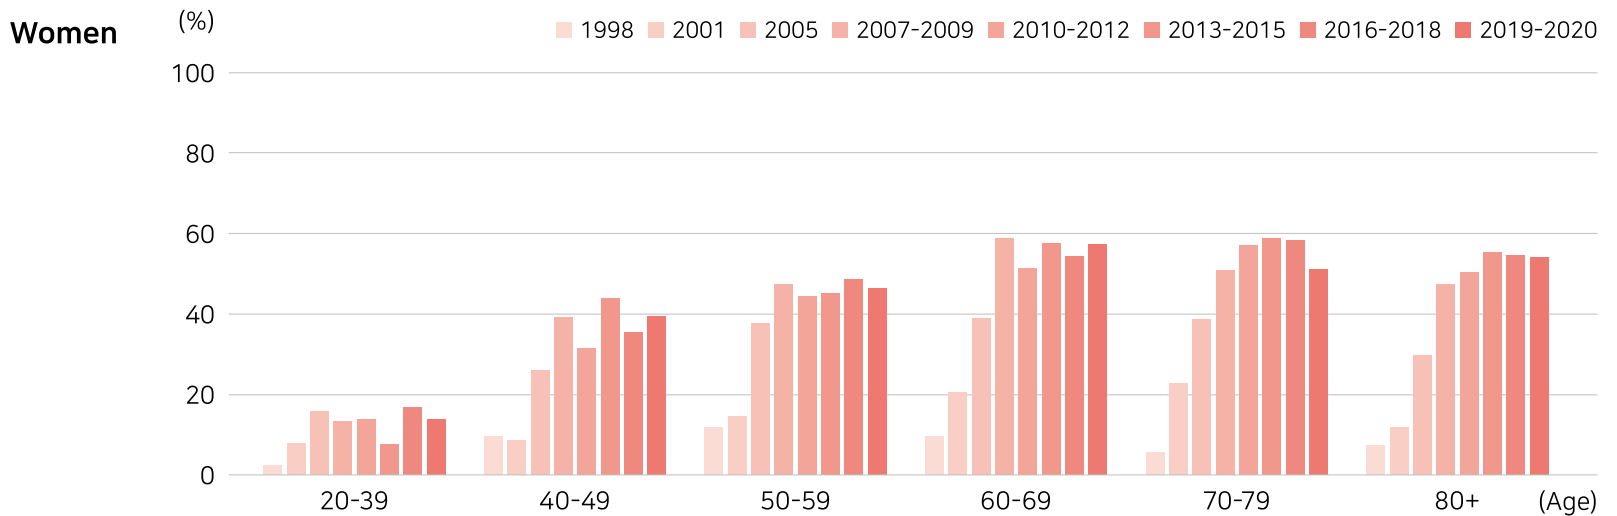

Data Source: Korea National Health and Nutrition Examination Survey 1998-2020

# Trends of Control Rate by Sex and Age

(Among treated)

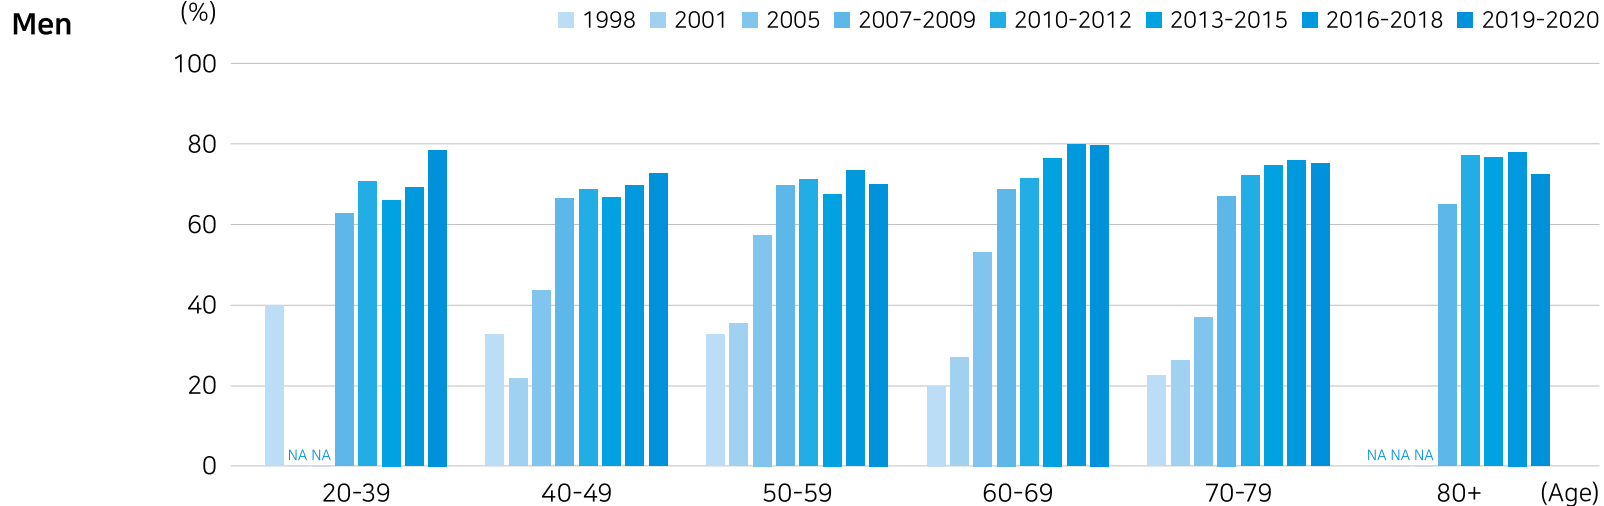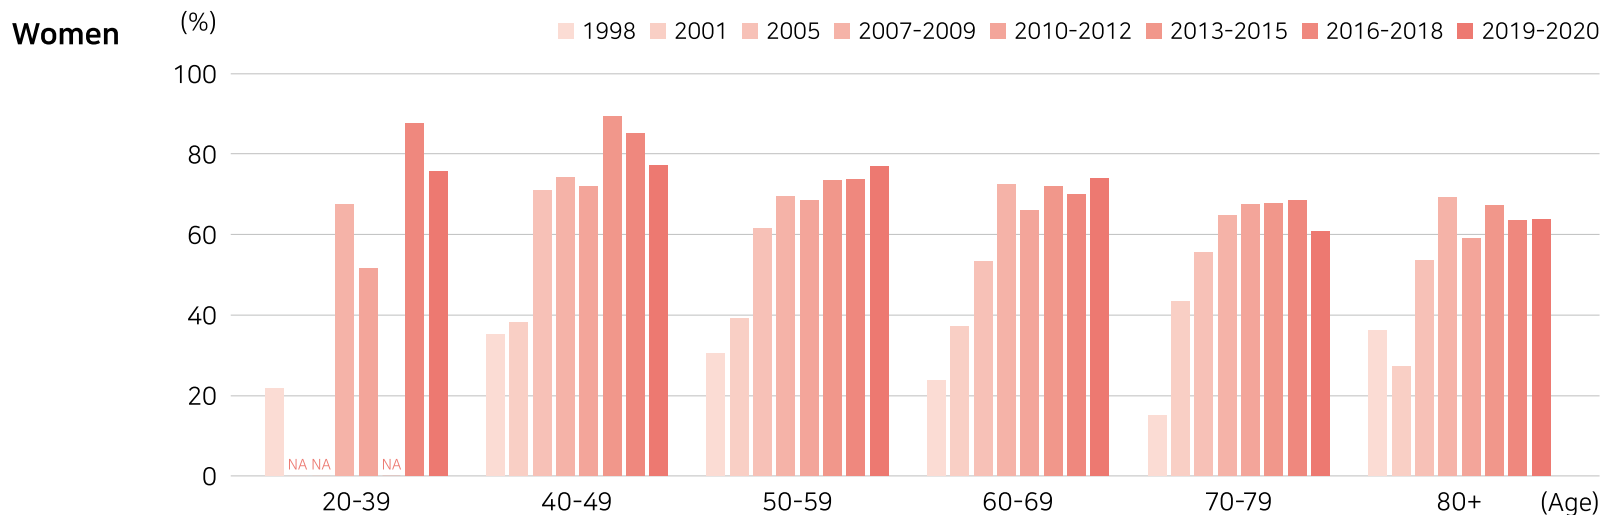

Data Source: Korea National Health and Nutrition Examination Survey 1998-2020

NA = Denominator less than 10

# KOREA HYPERTENSION FACT SHEET 2022

# Healthcare Utilization for Hypertension

Trends of Healthcare Utilization for Hypertension

Trends of Co-Treatment for Dyslipidemia and Diabetes

Trends of Antihypertensive Medication Use

Composition of Antihypertensive Treatment

Antihypertensive Medication Use by Sex and Age



# Trends of Healthcare Utilization for Hypertension

(Age 20+)

(x 1,000 persons)

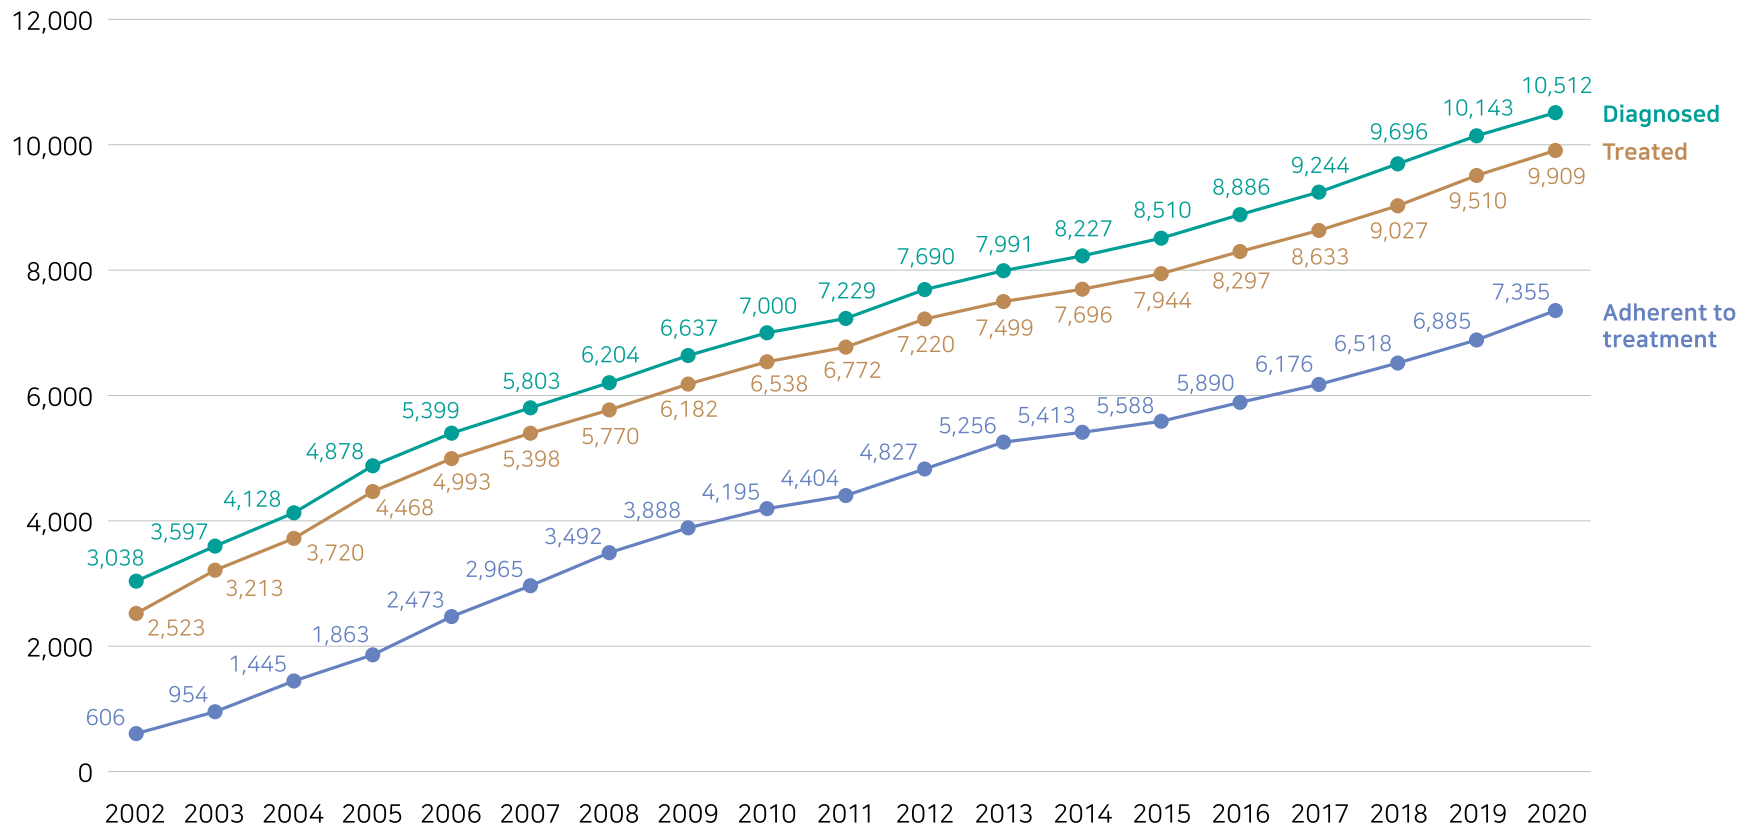

Data Source: Korea National Health Insurance Big Data 2002-2020

# Trends of Co-Treatment for Dyslipidemia and Diabetes

(Age 20+)

(x 1,000 persons)

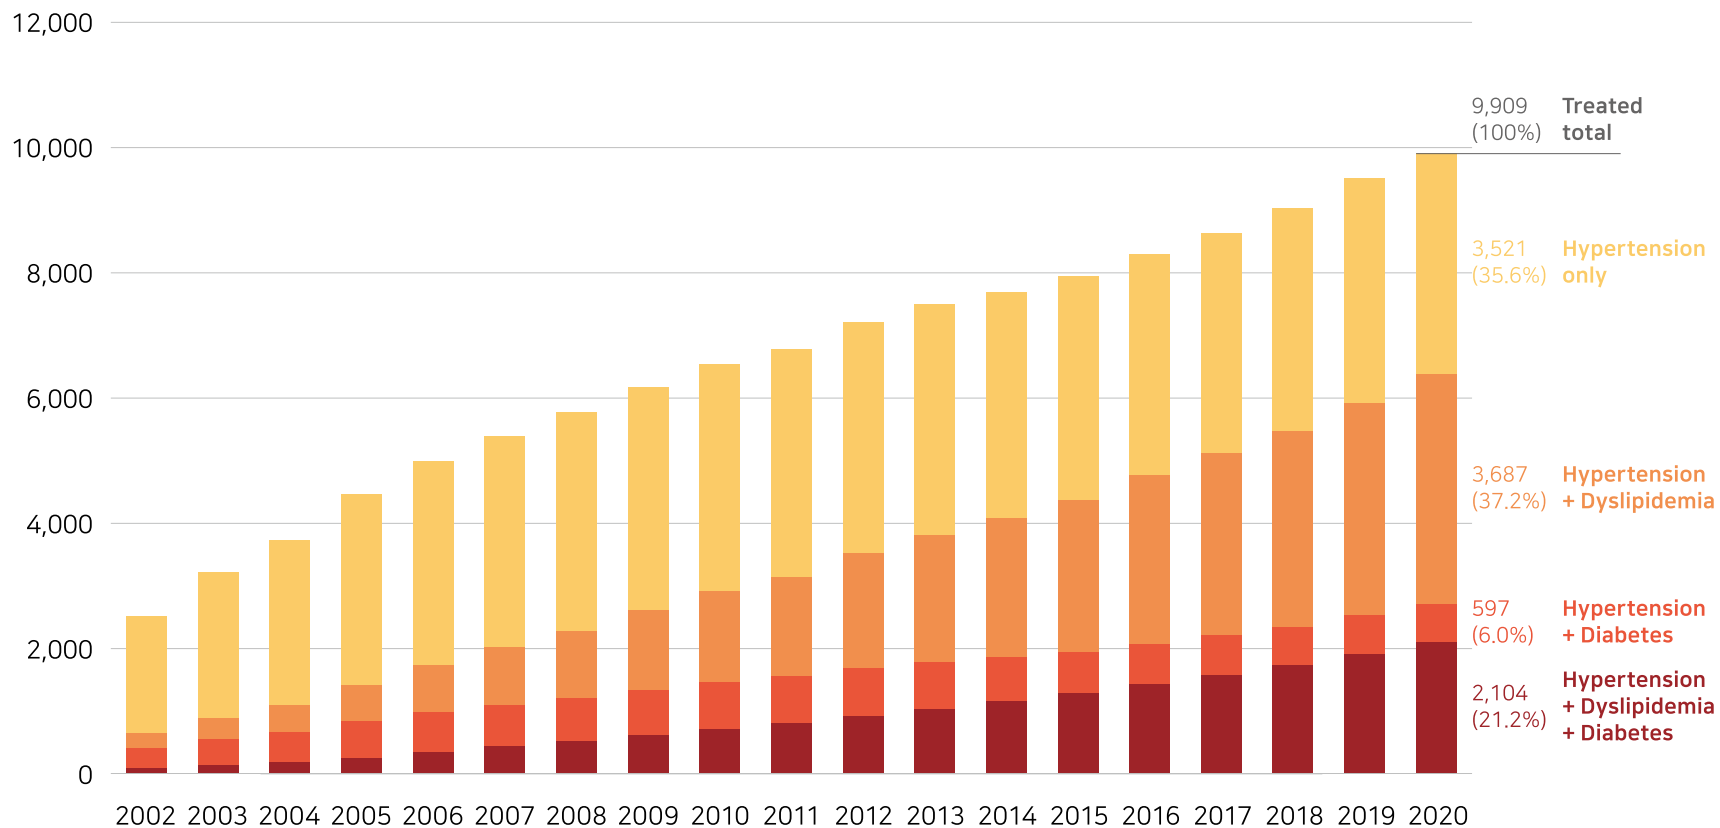

Data Source: Korea National Health Insurance Big Data 2002-2020

# Trends of Antihypertensive Medication Use

(Age 20+)

(x 1,000 persons)

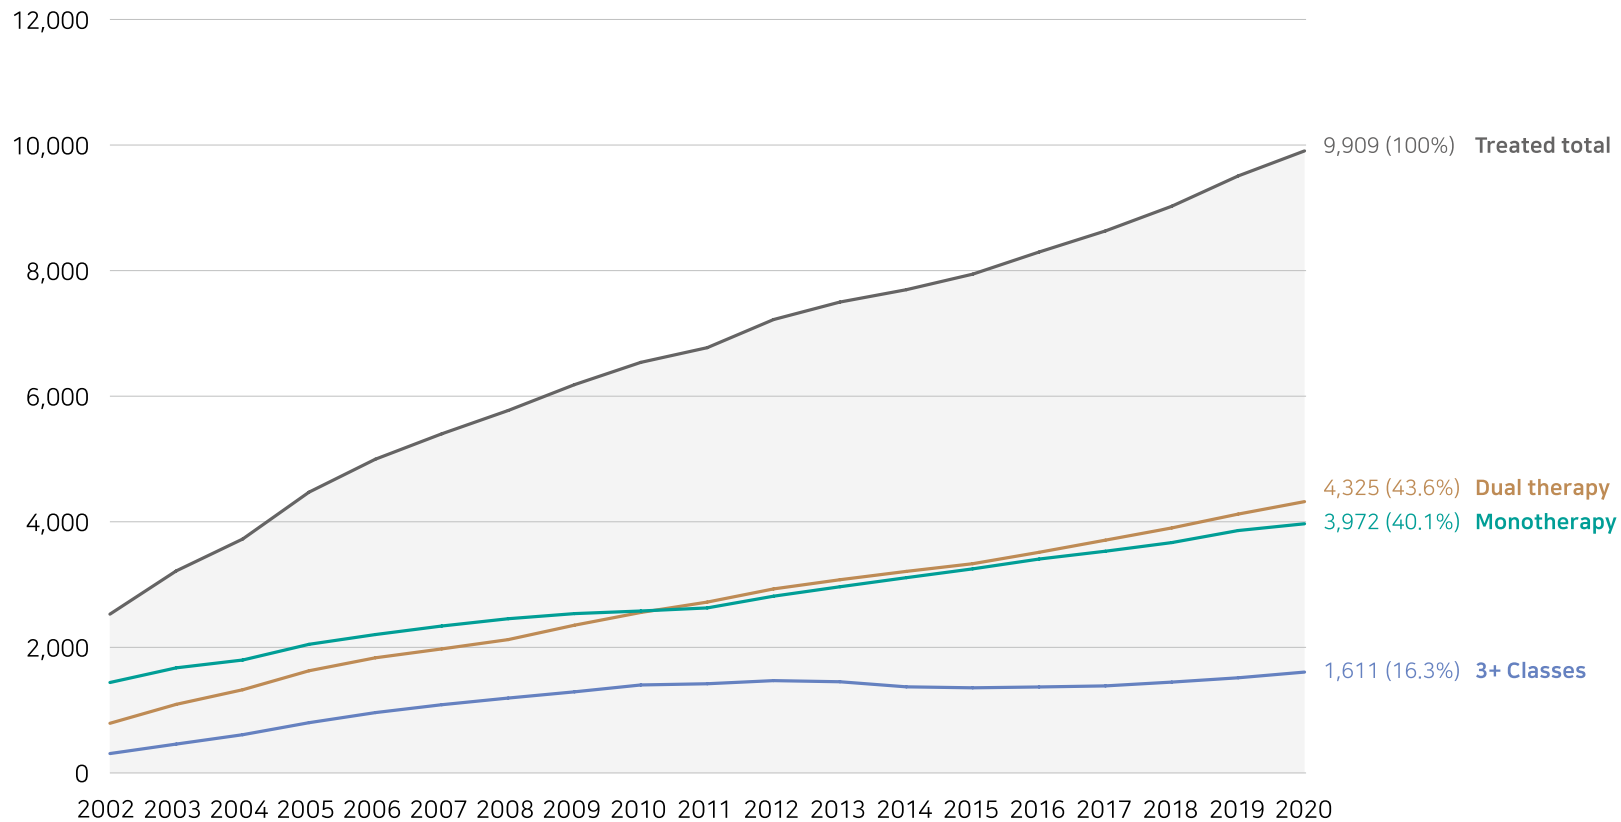

Data Source: Korea National Health Insurance Big Data 2002-2020



# Trends of Antihypertensive Medication Use

(Age 20+)

(x 1,000 persons)

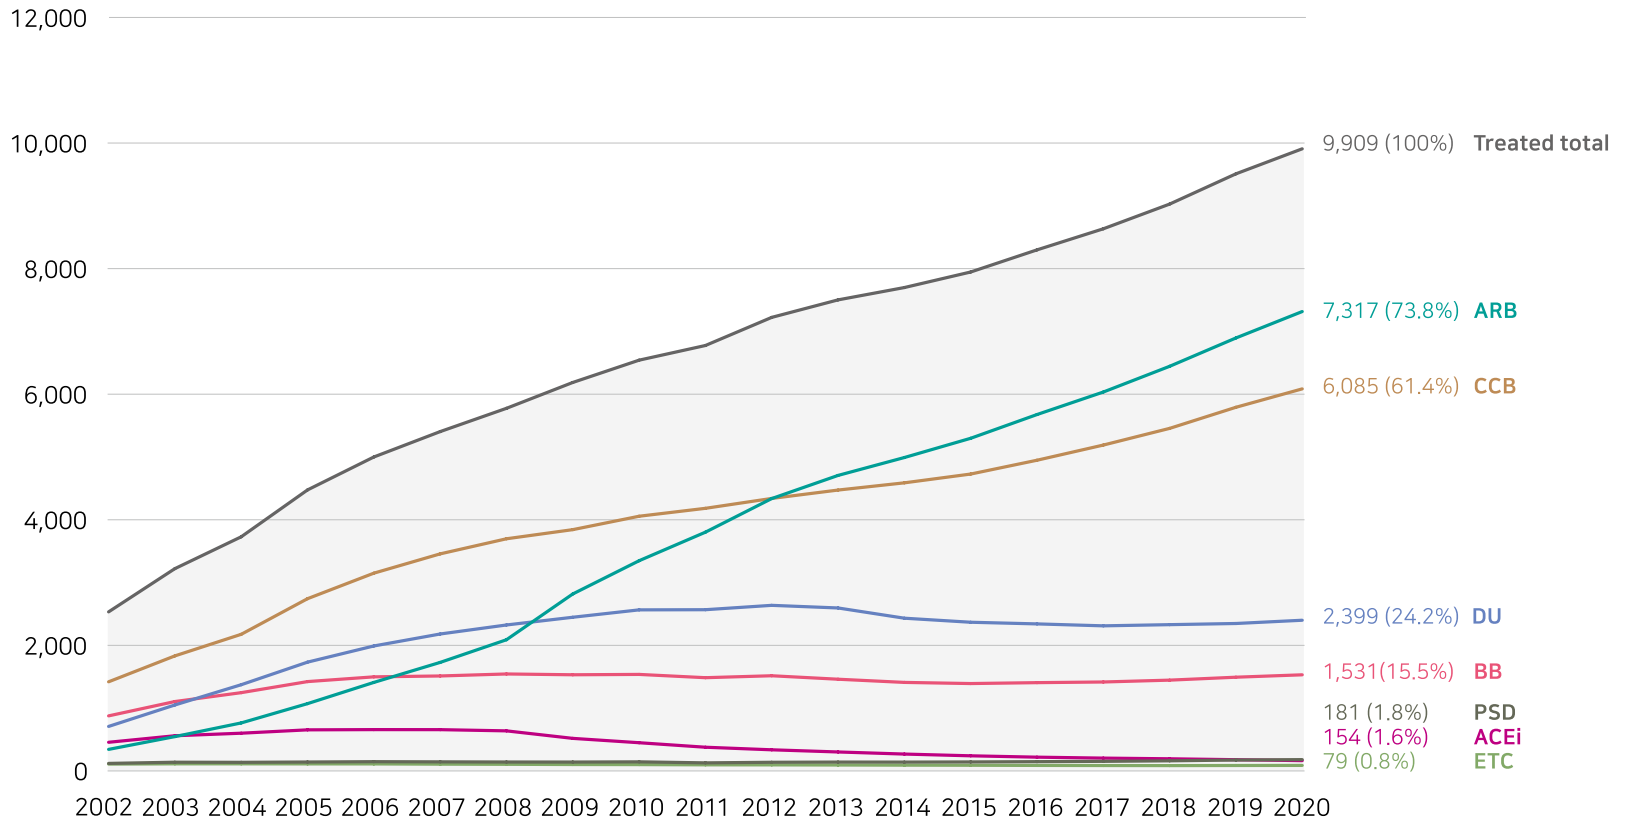

Data Source: Korea National Health Insurance Big Data 2002-2020

# Composition of Antihypertensive Treatment

(Age 20+)

**Monotherapy**  
Among 4.0 million, %

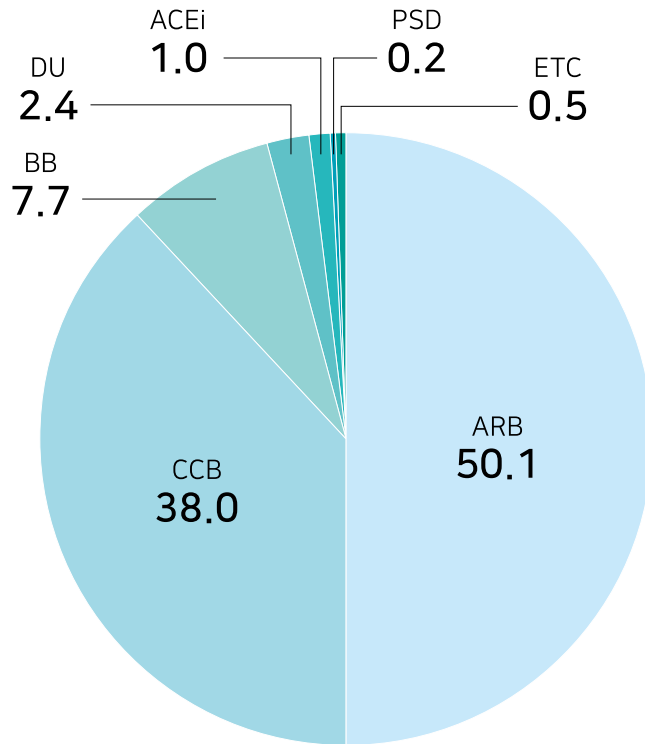

**Dual therapy**  
Among 4.3 million, %

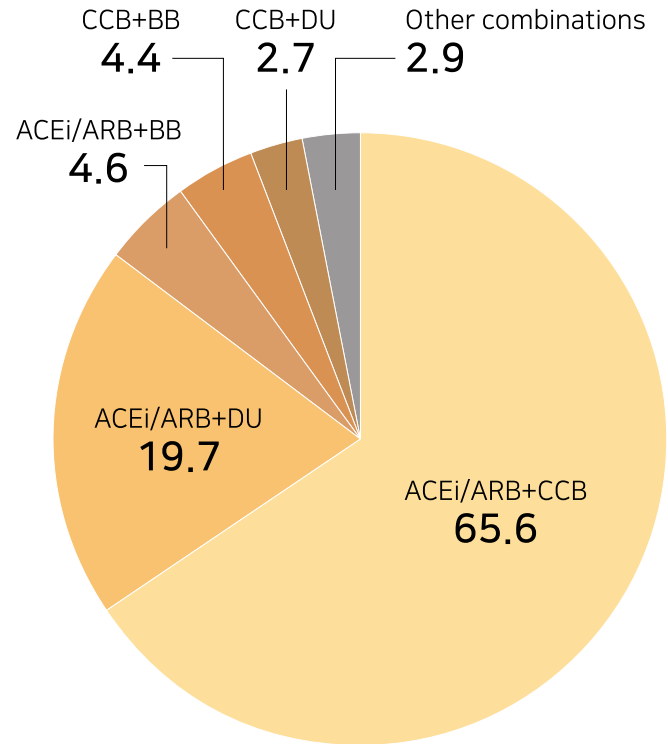

Data Source: Korea National Health Insurance Big Data 2020

# Composition of Antihypertensive Treatment

(Age 20+)

## Triple therapy

Among 1.3 million, %

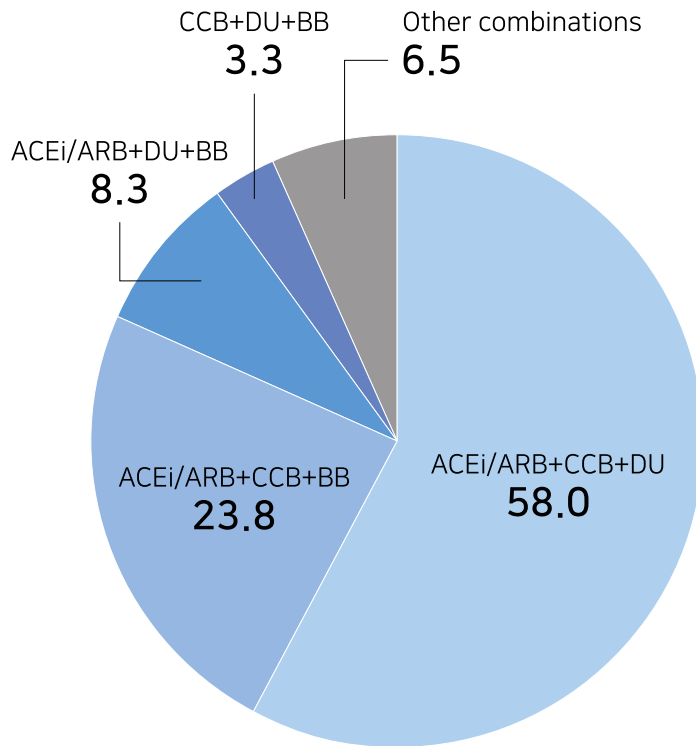

## Quadruple therapy

Among 0.3 million, %

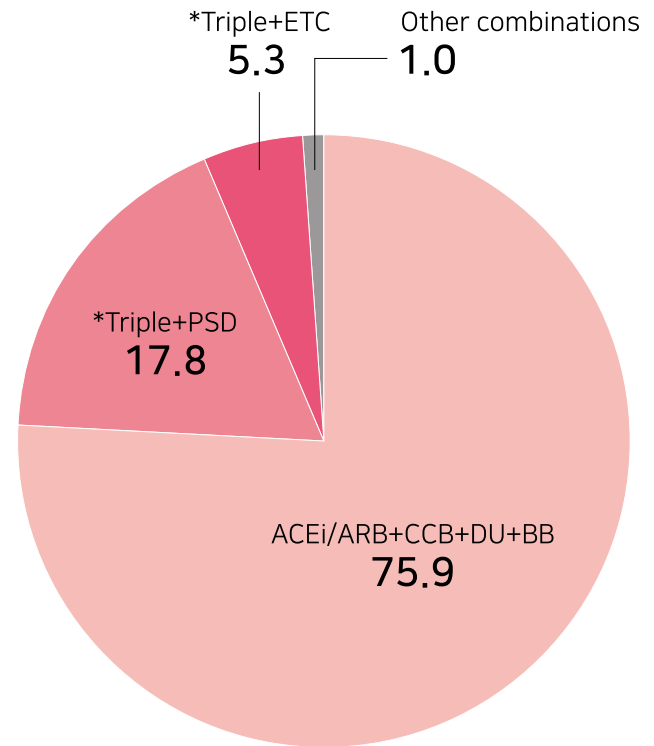

Data Source: Korea National Health Insurance Big Data 2020

\*Triple = Three of the ACEi/ARB, CCB, DU, or BB

# Antihypertensive Medication Use by Sex and Age

(Among treated, %)

■ Men ■ Women

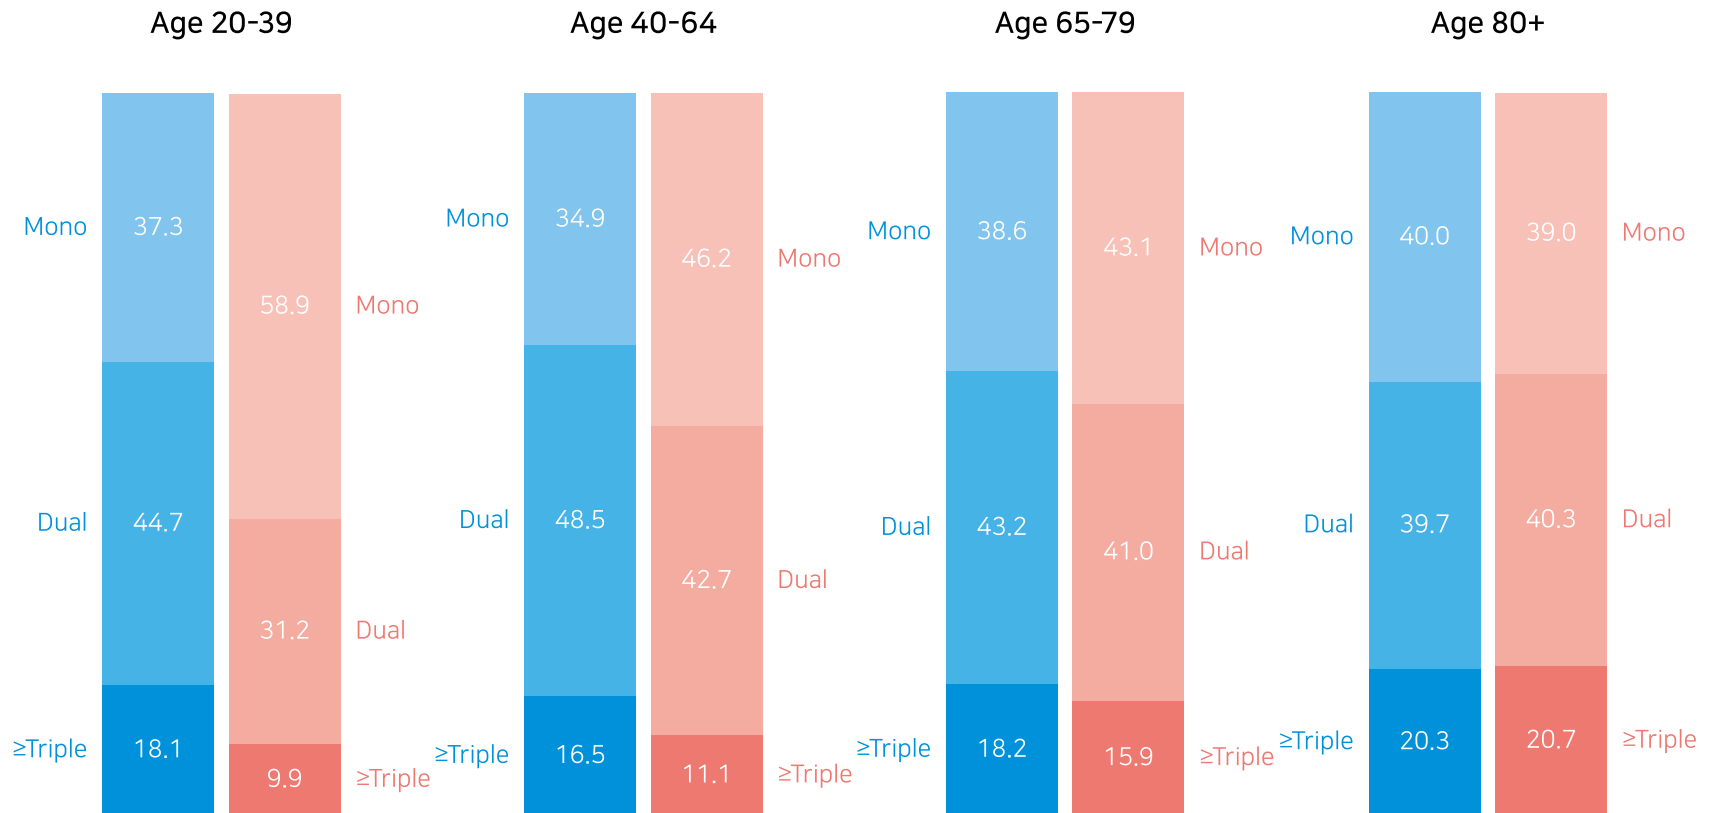

Data Source: Korea National Health Insurance Big Data 2020

# Antihypertensive Medication Use by Sex and Age

(Among treated, %)

■ Men ■ Women

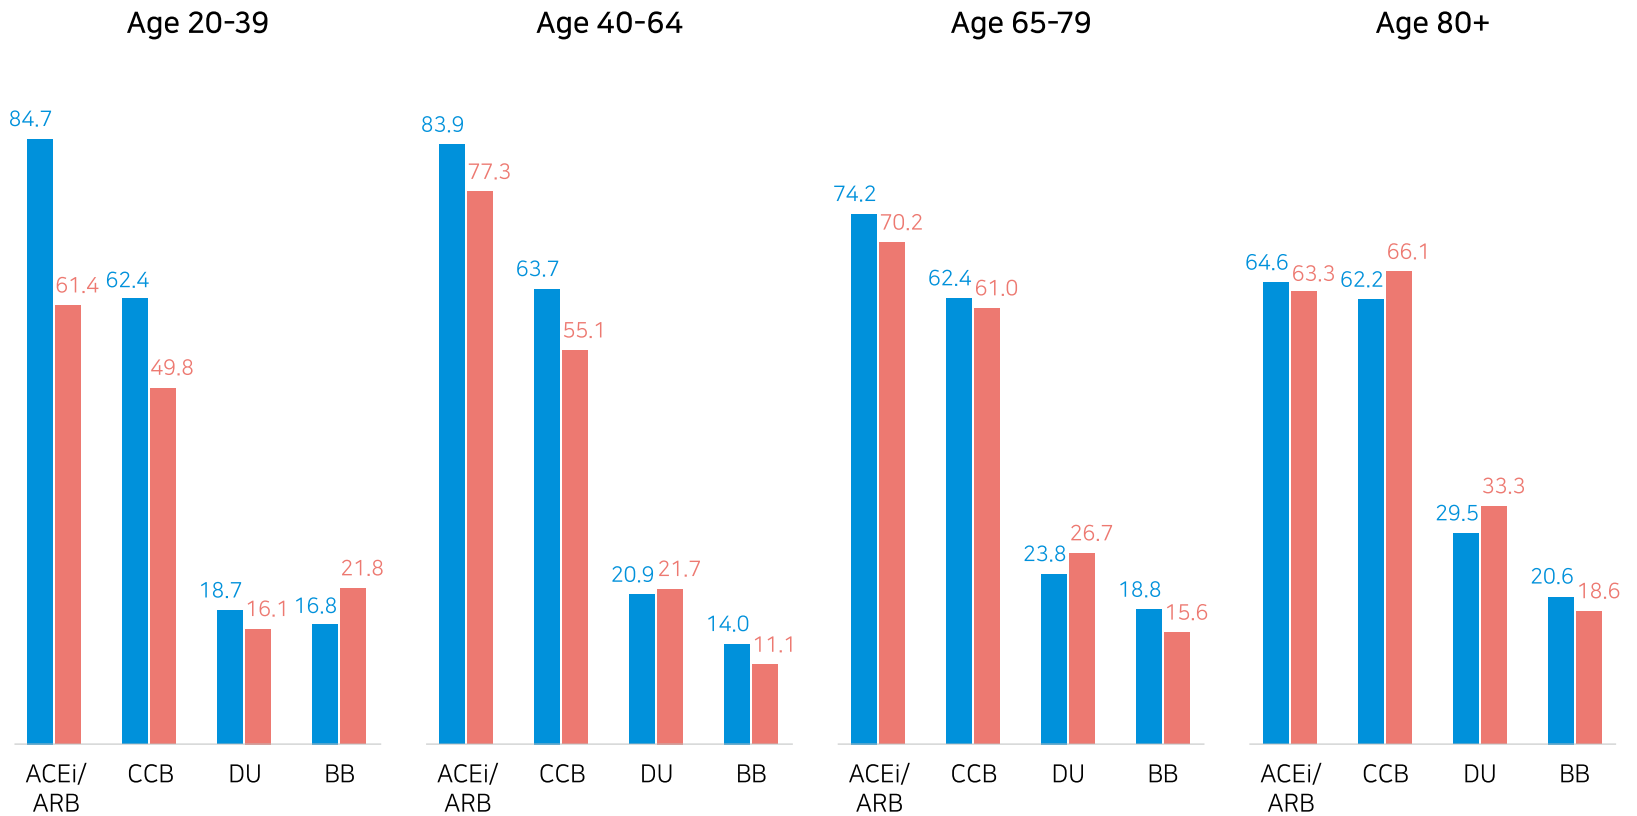

Data Source: Korea National Health Insurance Big Data 2020

# Hypertension in the Elderly

Trends of Number of People with Hypertension by Management Status

Trends of Awareness Rate in the Elderly

Trends of Treatment Rate in the Elderly

Trends of Adherence Rate in the Elderly

Trends of Combination Therapy Rate in the Elderly

Trends of Average Blood Pressure in the Elderly

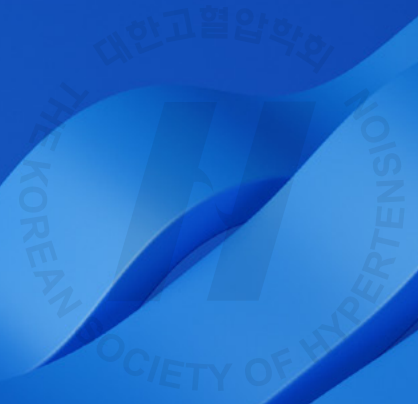

# Trends of Number of People with Hypertension by Management Status

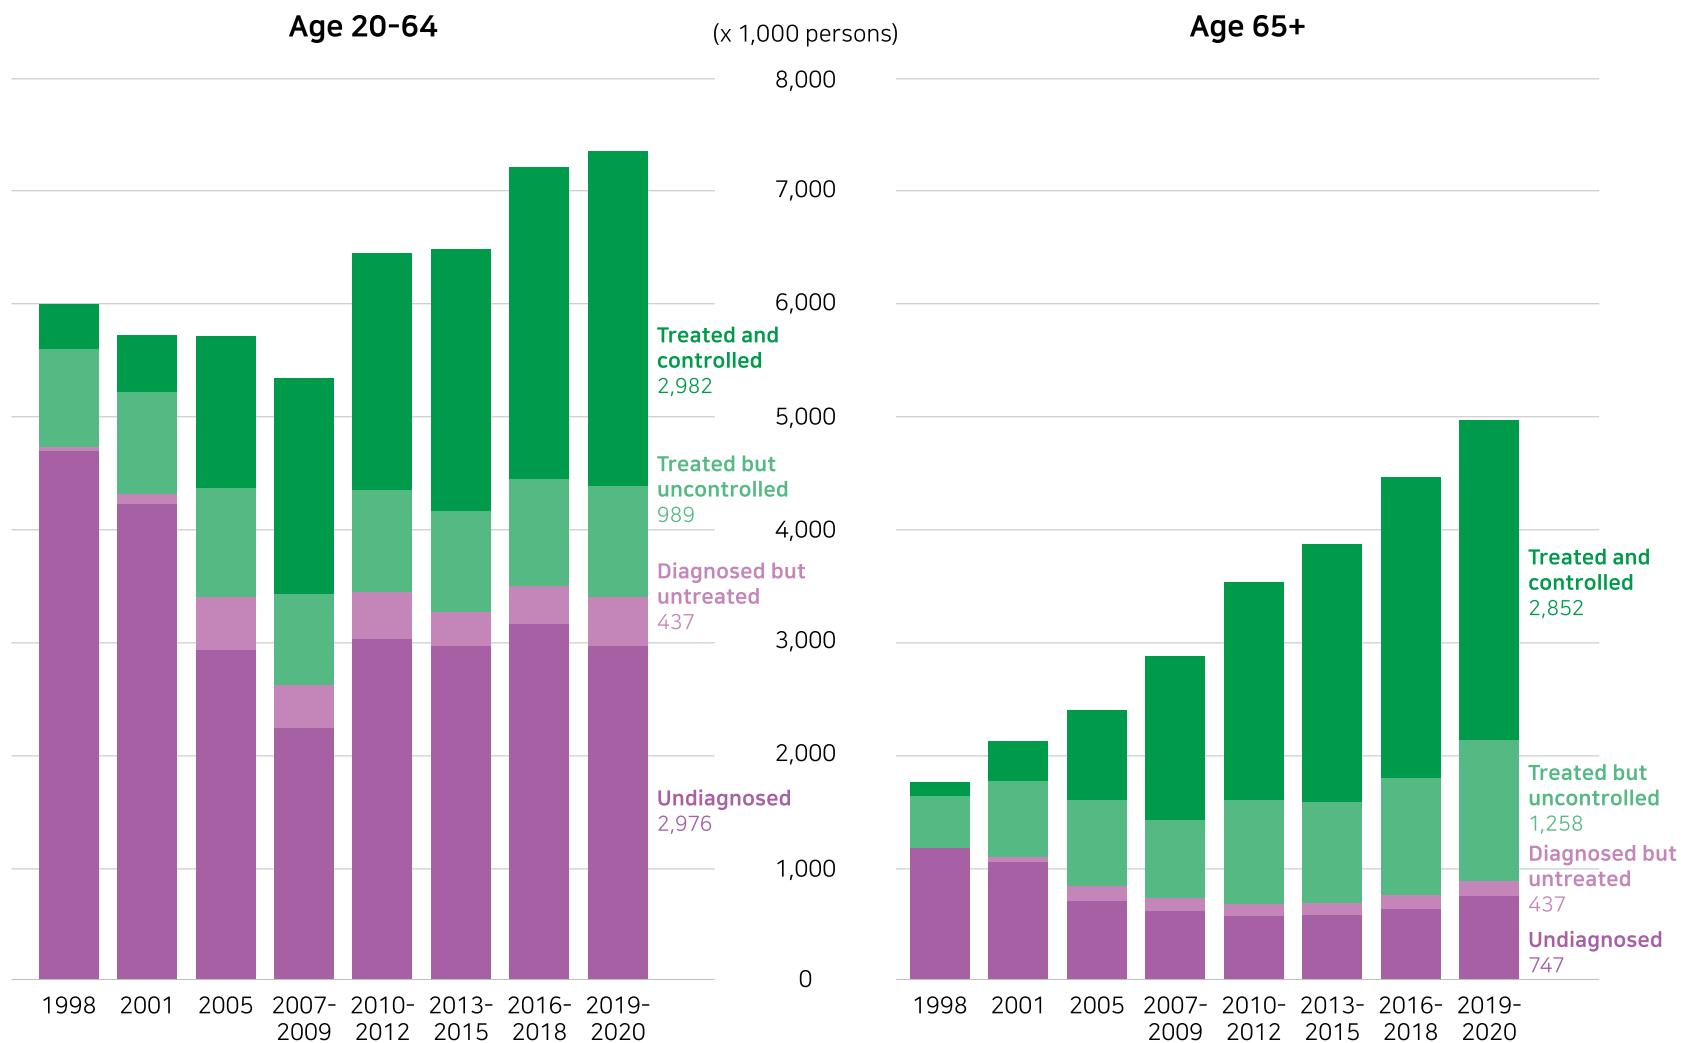

Data Source: Korea National Health and Nutrition Examination Survey 1998-2020

# Trends of Awareness Rate in the Elderly

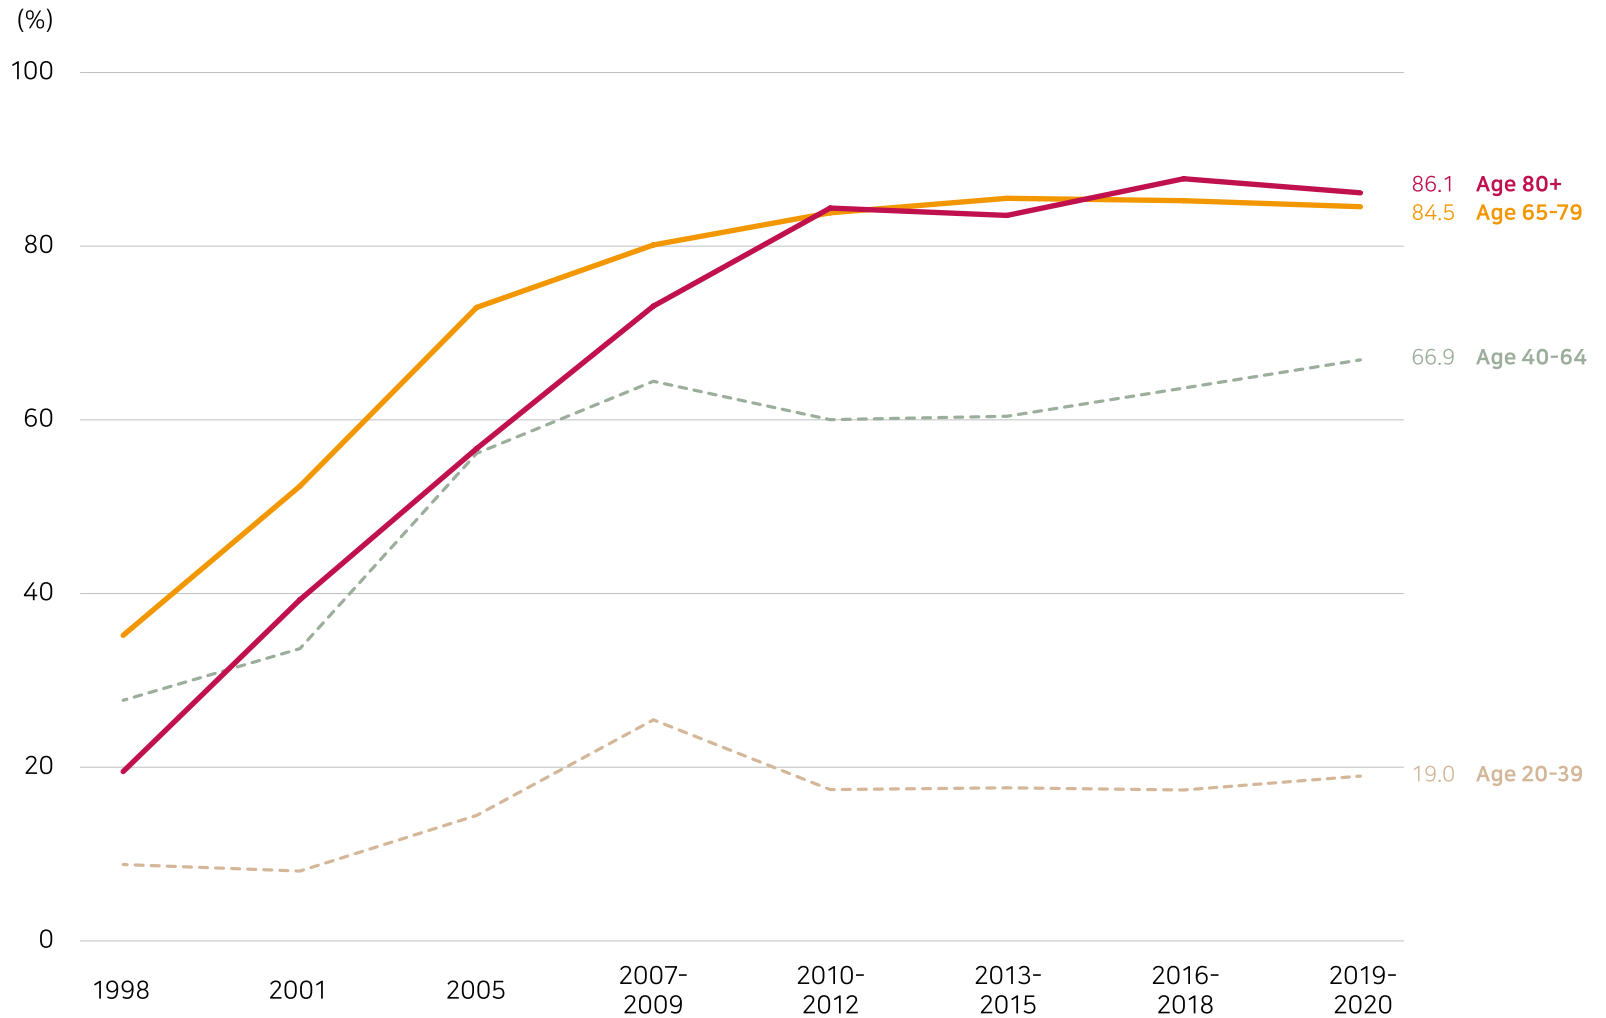

Data Source: Korea National Health and Nutrition Examination Survey 1998-2020



# Trends of Treatment Rate in the Elderly

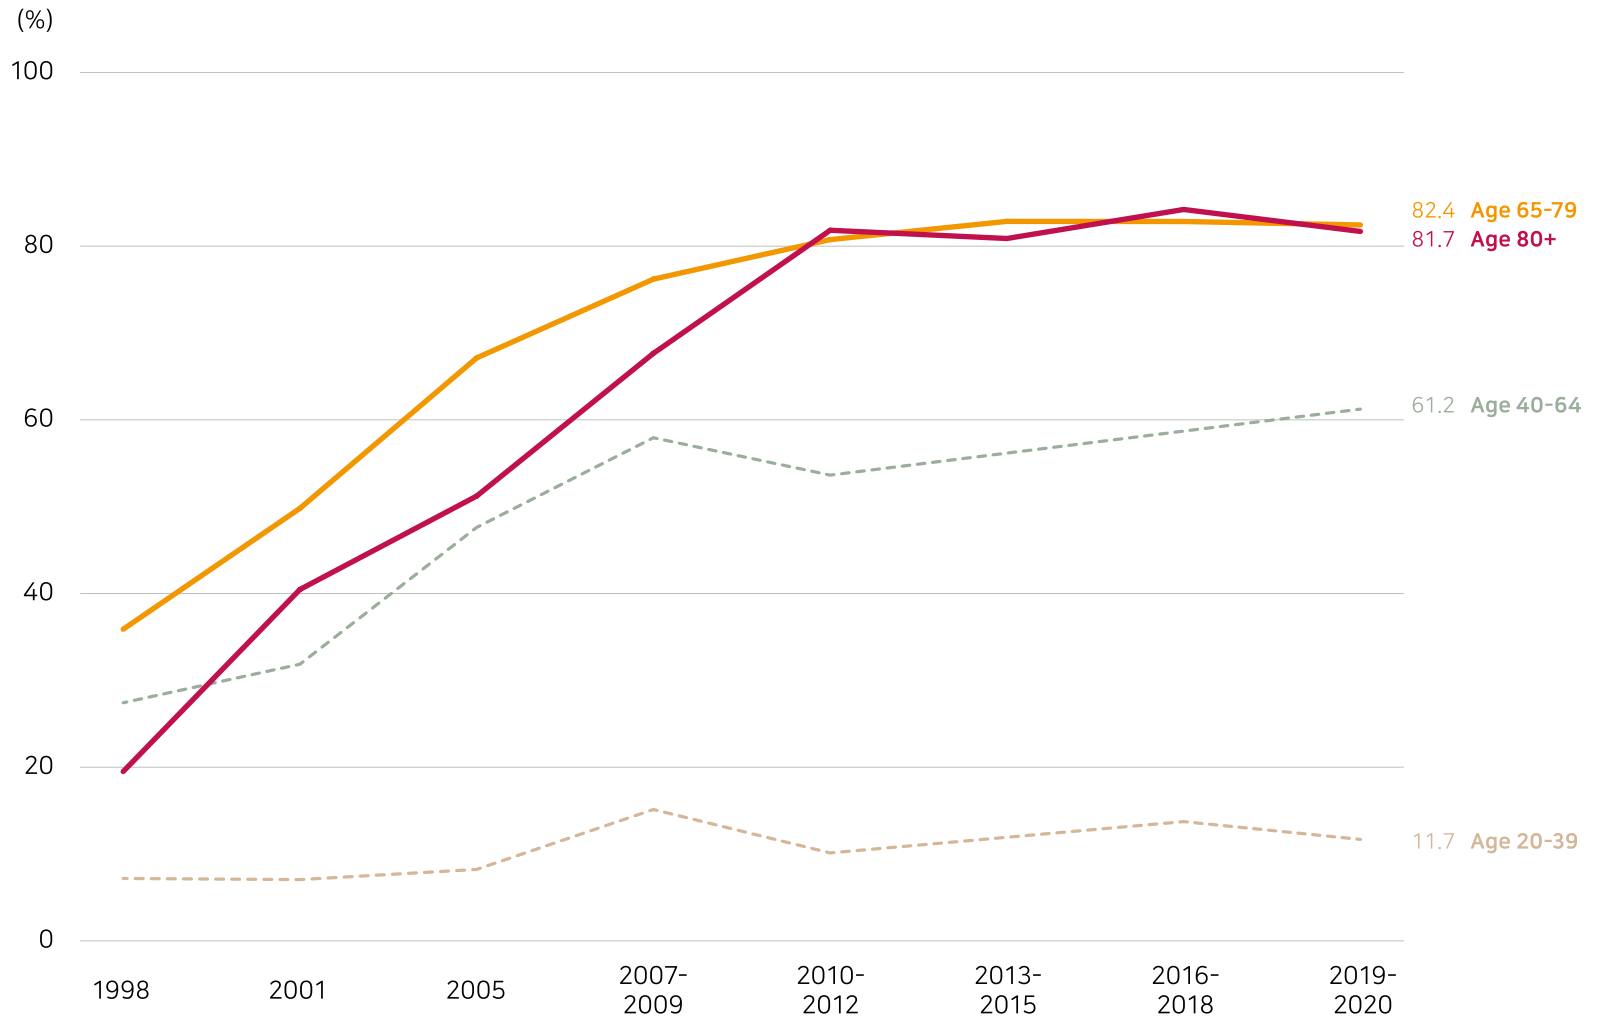

Data Source: Korea National Health and Nutrition Examination Survey 1998-2020

# Trends of Adherence Rate in the Elderly

(Among treated)

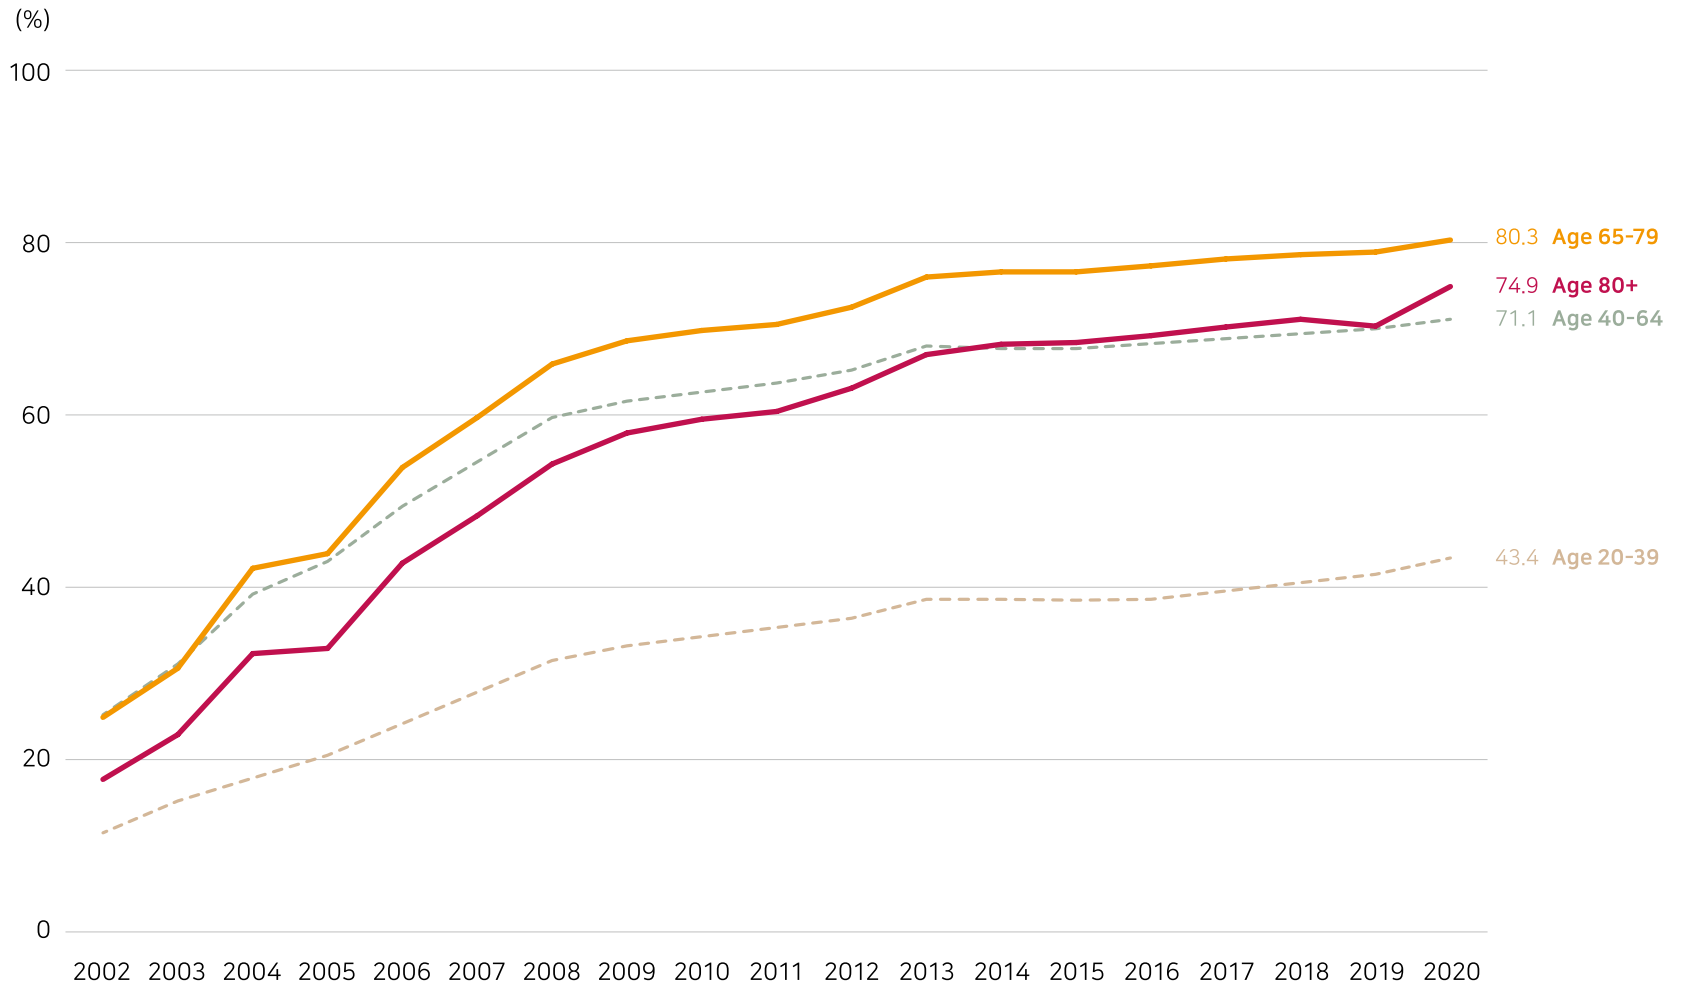

Data Source: Korea National Health Insurance Big Data 2002-2020

# Trends of Combination Therapy Rate in the Elderly

(Among treated)

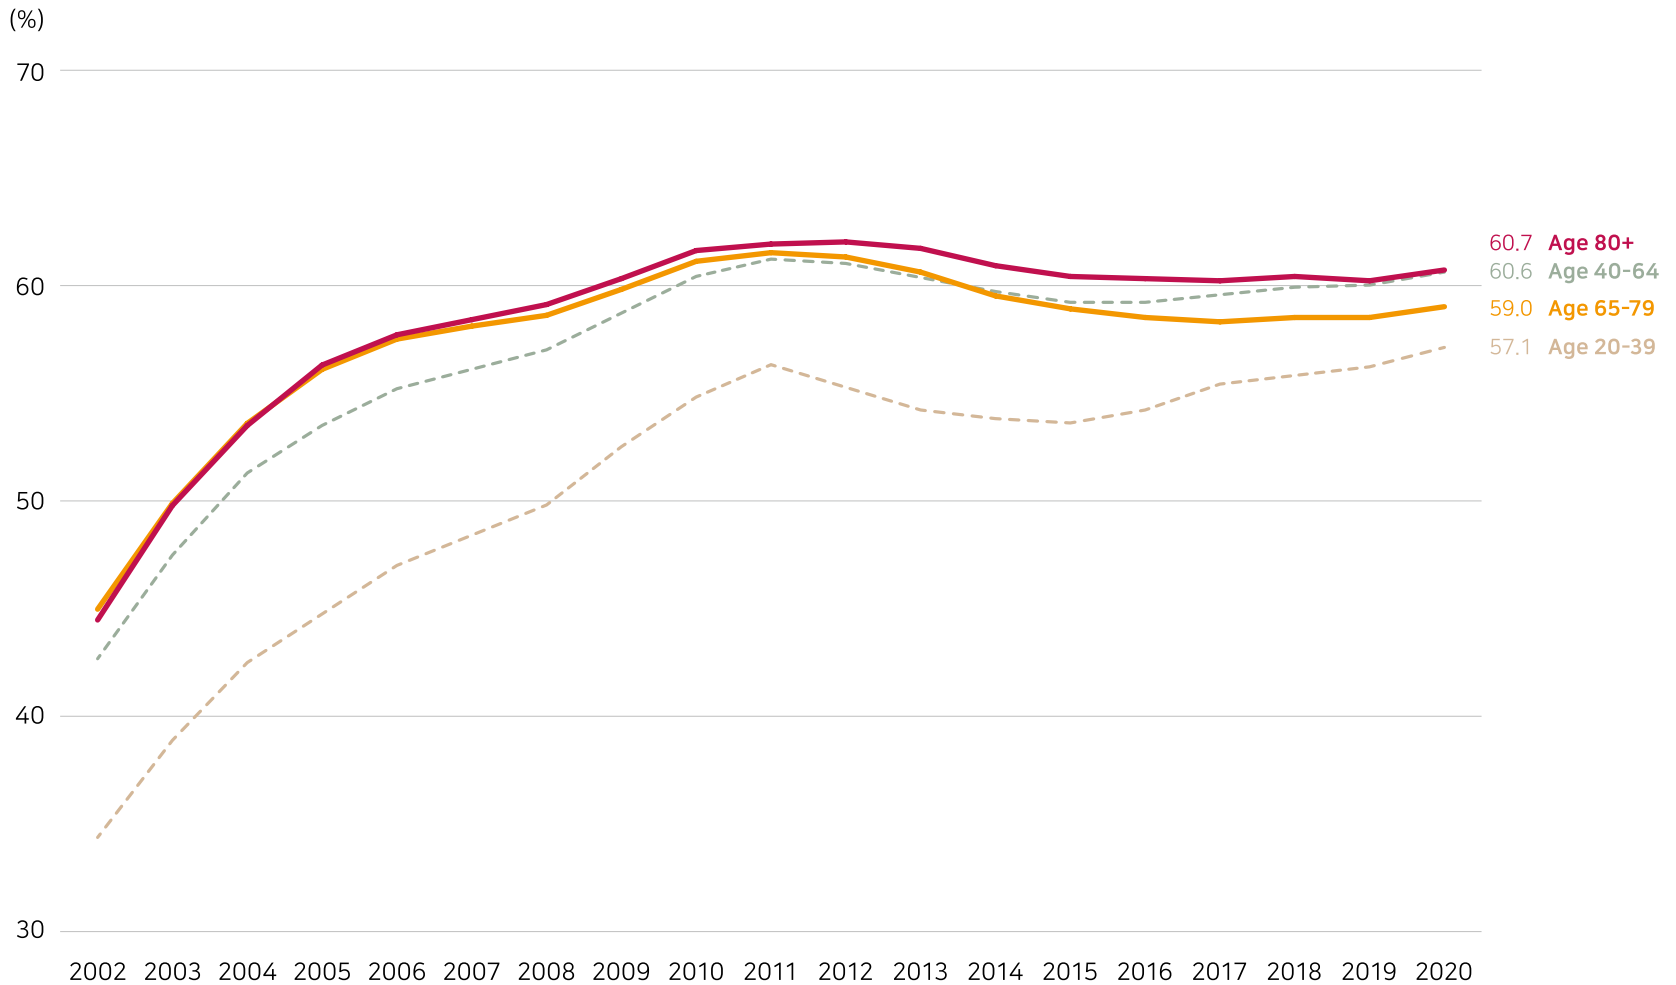

Data Source: Korea National Health Insurance Big Data 2002-2020

# Trends of Average Blood Pressure in the Elderly

(Among prevalent)

Systolic  
(mmHg)

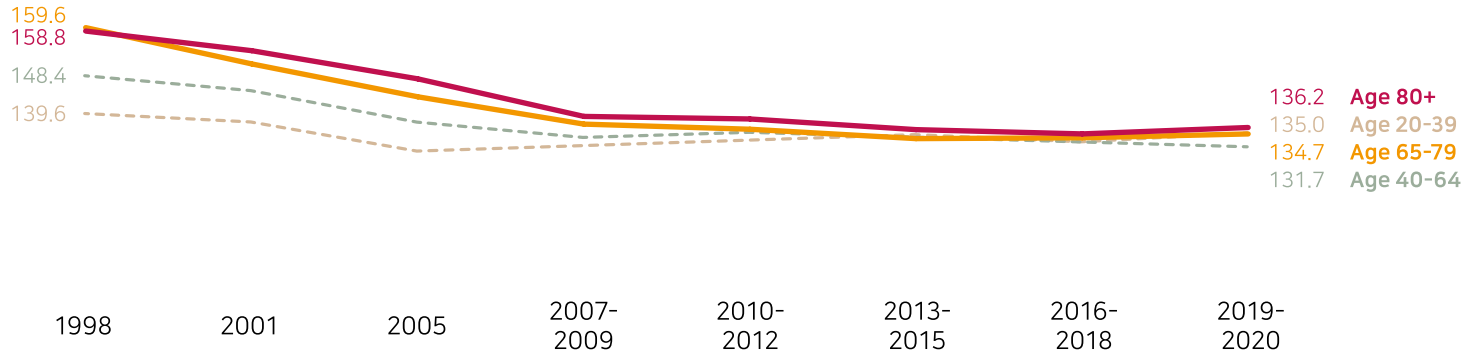

Diastolic  
(mmHg)

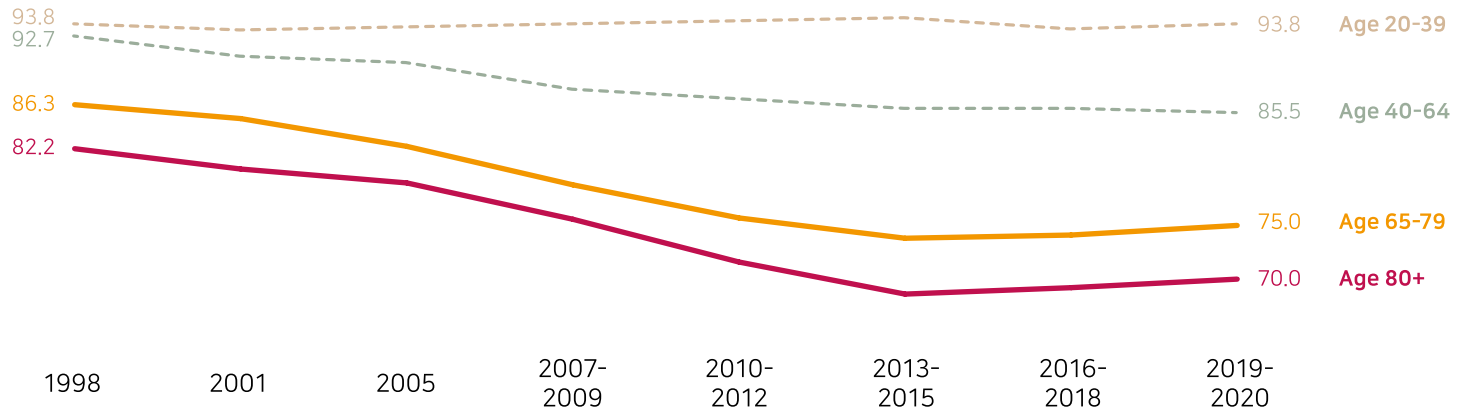

Data Source: Korea National Health and Nutrition Examination Survey 1998-2020

# Trends of Average Blood Pressure in the Elderly

(Among treated)

Systolic  
(mmHg)

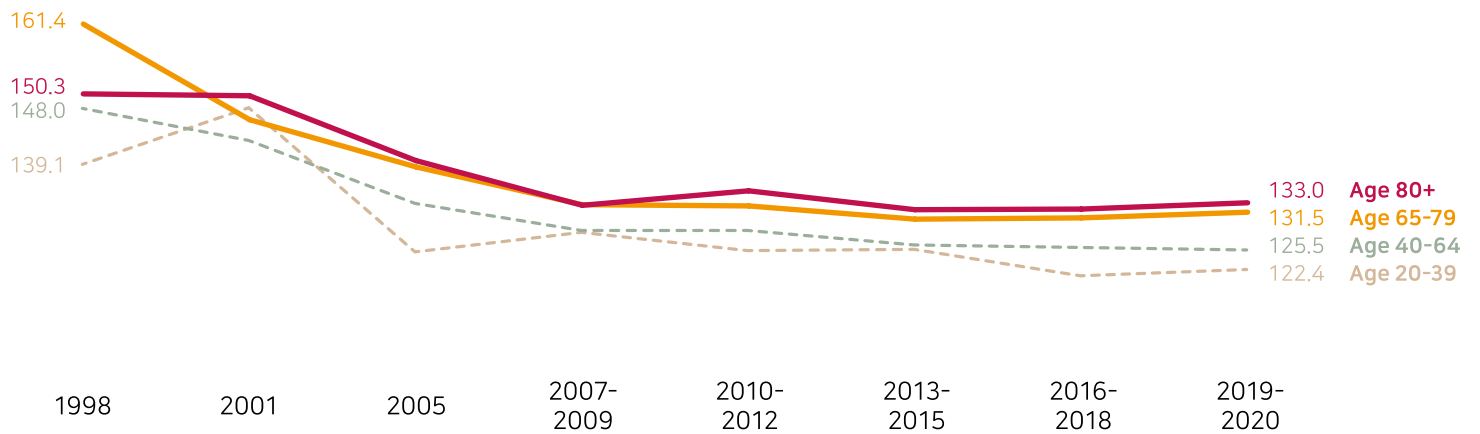

Diastolic  
(mmHg)

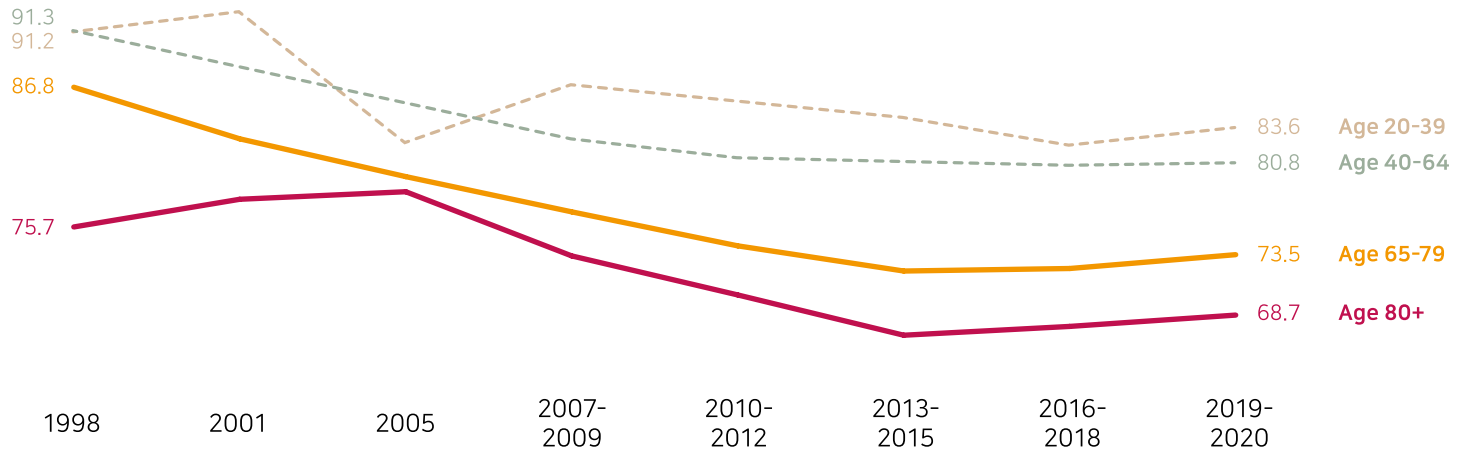

Data Source: Korea National Health and Nutrition Examination Survey 1998-2020

# KOREA HYPERTENSION FACT SHEET 2022

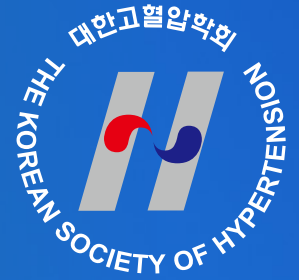

This fact sheet will be published in Clinical Hypertension, the official journal of the Korean Society of Hypertension  
The Korean Society of Hypertension (KSH) - Hypertension Epidemiology Research Working Group.  
Korea Hypertension Fact Sheet 2022. Clinical Hypertension 2022 (in press).

[www.koreanhypertension.org](http://www.koreanhypertension.org)
